# Supplementary material for: Effect of diamagnetic Zn(ii) ions on the SMM properties of a series of trinuclear ZnDy2 and tetranuclear Zn2Dy2 (LnIII = Dy, Tb, Gd) complexes: combined experimental and theoretical studies
Source: Royal Society of Chemistry journal article supplement (doi:10.1039/d4dt00417e), 2024-01-01
Supplement: d4dt00417e1.pdf [file d4dt00417e1.pdf]

## Supporting Information

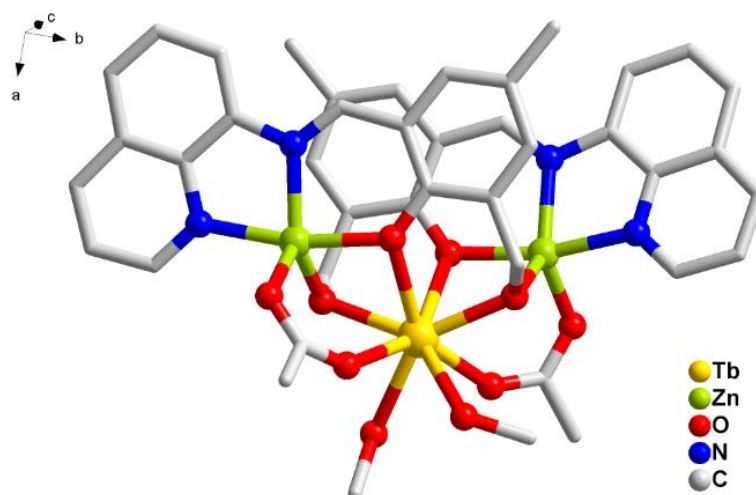

**Figure S1.** Molecular Structure of **2**. (Nitrate ion and Hydrogen atoms are omitted for clarity)

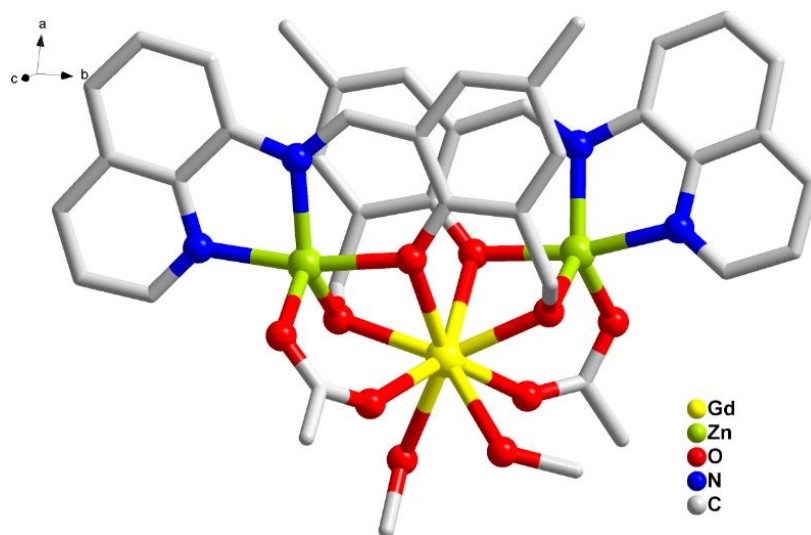

**Figure S2.** Molecular Structure of **3**. (Nitrate ion and Hydrogen atoms are omitted for clarity)

**Table S1.** Selected bond distances (Å) and bond angles (°) parameters for **1**.

| Bond Lengths around Dysprosium(1)   |          | Bond Lengths around Zinc (2) |            |
|-------------------------------------|----------|------------------------------|------------|
| Dy(1)-O(3)                          | 2.469(3) | Zn(2)-O(3)                   | 2.093(3)   |
| Dy(1)-O(2)                          | 2.272(3) | Zn(2)-O(2)                   | 1.969(3)   |
| Dy(1)-O(1)                          | 2.429(4) | Zn(2)-O(8)                   | 2.012(4)   |
| Dy(1)-O(4)                          | 2.294(3) | Zn(2)-N(4)                   | 2.074(4)   |
| Dy(1)-O(7)                          | 2.340(3) | Zn(2)-N(3)                   | 2.134(4)   |
| Dy(1)-O(5)                          | 2.326(3) | <b>Bond angles</b>           |            |
| Dy(1)-O(9)                          | 2.476(3) | Zn(1)-O(1)-Dy(1)             | 93.38(11)  |
| Dy(1)-O(10)                         | 2.449(6) | Zn(1)-O(4)-Dy(1)             | 100.97(13) |
| <b>Bond Lengths around Zinc (1)</b> |          | Zn(2)-O(3)-Dy(1)             | 92.30(11)  |
| Zn(1)-O(1)                          | 2.111(3) | Zn(2)-Dy(1)-Zn(1)            | 110.64(3)  |
| Zn(1)-O(4)                          | 1.990(3) | Zn(2)-O(2)-Dy(1)             | 101.93(13) |
| Zn(1)-O(6)                          | 2.022(3) |                              |            |
| Zn(1)-N(1)                          | 2.133(4) |                              |            |
| Zn(1)-N(2)                          | 2.081(4) |                              |            |

**Table S2.** Selected bond distances (Å) and bond angles (°) parameters for **2**.

| Bond Lengths around Terbium (1)     |          | Bond Lengths around Zinc (2) |            |
|-------------------------------------|----------|------------------------------|------------|
| Tb(1)-O(3)                          | 2.296(4) | Zn(2)-O(4)                   | 2.117(4)   |
| Tb(1)-O(2)                          | 2.481(4) | Zn(2)-O(1)                   | 1.979(5)   |
| Tb(1)-O(1)                          | 2.329(4) | Zn(2)-O(7)                   | 2.012(4)   |
| Tb(1)-O(4)                          | 2.431(5) | Zn(2)-N(4)                   | 2.130(5)   |
| Tb(1)-O(8)                          | 2.349(4) | Zn(2)-N(3)                   | 2.057(6)   |
| Tb(1)-O(5)                          | 2.367(5) | <b>Bond angles</b>           |            |
| Tb(1)-O(9)                          | 2.462(8) | Zn(1)-O(1)-Tb(1)             | 100.83(18) |
| Tb(1)-O(10)                         | 2.480(4) | Zn(1)-O(4)-Tb(1)             | 93.83(16)  |
| <b>Bond Lengths around Zinc (1)</b> |          | Zn(2)-O(3)-Tb(1)             | 101.95(18) |
| Zn(1)-O(3)                          | 1.959(4) | Zn(2)-Tb(1)-Zn(1)            | 110.53(2)  |
| Zn(1)-O(2)                          | 2.093(4) | Zn(2)-O(2)-Tb(1)             | 92.41(15)  |
| Zn(1)-O(6)                          | 1.999(5) |                              |            |
| Zn(1)-N(1)                          | 2.060(5) |                              |            |
| Zn(1)-N(2)                          | 2.127(5) |                              |            |

**Table S3.** Selected bond distances (Å) and bond angles (°) parameters for **3**.

| Bond Lengths around Gadolinium (1) |          | Bond Lengths around Zinc (2) |             |
|------------------------------------|----------|------------------------------|-------------|
| Gd(1)-O(3)                         | 2.331(4) | Zn(2)-O(8)                   | 2.086(4)    |
| Gd(1)-O(2)                         | 2.424(4) | Zn(2)-O(4)                   | 1.964(3)    |
| Gd(1)-O(1)                         | 2.329(4) | Zn(2)-O(7)                   | 2.003(4)    |
| Gd(1)-O(4)                         | 2.274(4) | Zn(2)-N(4)                   | 2.054(5)    |
| Gd(1)-O(8)                         | 2.472(3) | Zn(2)-N(3)                   | 2.128(4)    |
| Gd(1)-O(5)                         | 2.478(4) | Bond angles                  |             |
| Gd(1)-O(6)                         | 2.340(4) |                              |             |
| Gd(1)-O(10)                        | 2.448(6) | Zn(1)-O(9)-Gd(1)             | 101.30(15)  |
| Bond Lengths around Zinc (1)       |          | Zn(1)-O(8)-Gd(1)             | 92.68(13)   |
| Zn(1)-O(3)                         | 1.959(4) | Zn(2)-O(3)-Gd(1)             | 101.95(18)  |
| Zn(1)-O(9)                         | 1.981(4) | Zn(2)-Gd(1)-Zn(1)            | 110.599(17) |
| Zn(1)-O(1)                         | 2.012(3) | Zn(2)-O(4)-Gd(1)             | 102.36(15)  |
| Zn(1)-N(1)                         | 2.126(4) |                              |             |
| Zn(1)-N(2)                         | 2.064(5) |                              |             |

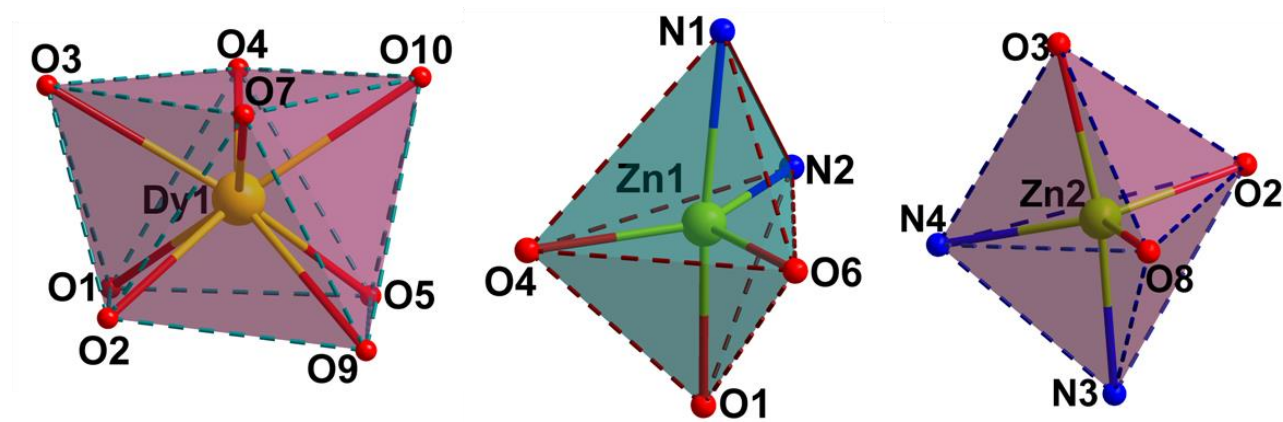

**Figure S3.** Coordination geometry around Dy<sup>III</sup> ion and Zn<sup>II</sup> ions.

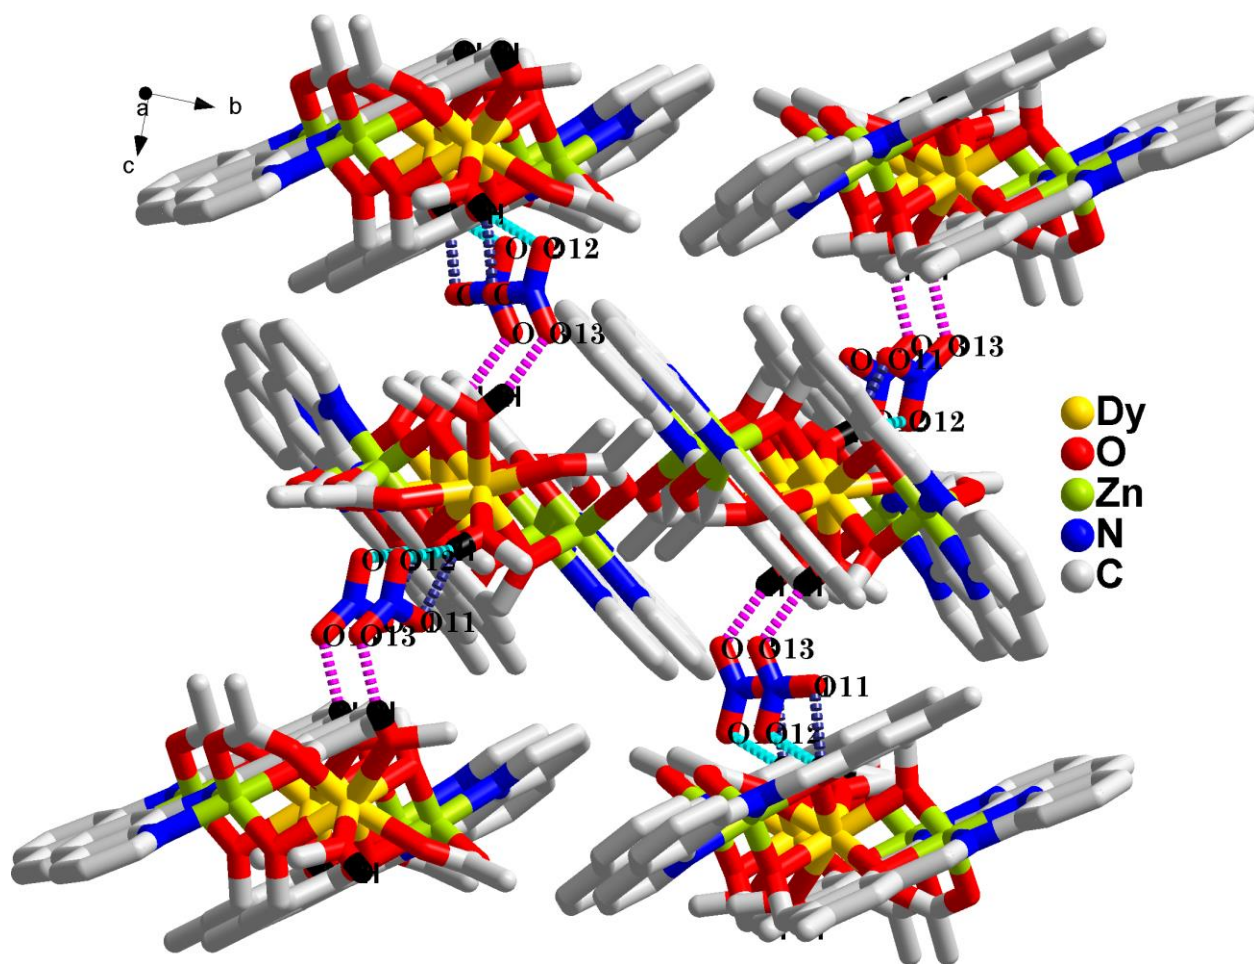

**Figure S4.** Packing diagram of 1.

**Table S4.** Comparison of certain bond length and bond angle of trinuclear Zn-Ln complexes.

| Metal complex                                                                                                                                                                                                            | Dy-O                  | Zn-O                   | Zn-N                  | Zn-Dy-Zn   | Ref |
|--------------------------------------------------------------------------------------------------------------------------------------------------------------------------------------------------------------------------|-----------------------|------------------------|-----------------------|------------|-----|
| [DyZn <sub>2</sub> (O <sub>2</sub> CCMe <sub>3</sub> ) <sub>6</sub> (C <sub>9</sub> H <sub>7</sub> N) <sub>2</sub> (NO <sub>3</sub> )]                                                                                   | 2.279(5)-<br>2.464(6) | 1.907(5)-<br>1.943(6)  | 2.082(6)              | 160.31(2)° | [1] |
| [DyZn <sub>2</sub> (μ-O <sub>2</sub> -CC <sub>2</sub> H <sub>5</sub> ) <sub>5</sub> (O <sub>2</sub> CC <sub>2</sub> H <sub>5</sub> )(C <sub>9</sub> H <sub>7</sub> N) <sub>2</sub> (NO <sub>3</sub> )(H <sub>2</sub> O)] | 2.264(4)-<br>2.520(5) | 1.937(4)-<br>1.972(4)  | 2.060(4)-<br>2.064(4) | 137.84(4)° | [1] |
| [Zn <sub>2</sub> Dy(LH <sub>3</sub> ) <sub>4</sub> ]·3NO <sub>3</sub> ·2MeOH·1.5H <sub>2</sub> O<br>LH <sub>4</sub> = [2-(2-hydroxy-3-(hydroxymethyl)-5-methylbenzylideneamino)-2-methylpropane-1,3-diol]                | 2.312(6)-<br>2.408(7) | 2.015(8)-<br>2.217(11) | 2.049(8)-<br>2.062(9) | 177.80°    | [2] |
| [Zn <sub>2</sub> Dy(L <sub>1</sub> ) <sub>2</sub> (OAc) <sub>4</sub> ](NO <sub>3</sub> ) <sub>0.92</sub> (Br) <sub>0.08</sub>                                                                                            | 2.28(2)-<br>2.55(3)   | 1.94(1)-<br>2.40(4)    | 2.01(4)-<br>2.04(4)   | 175.57(1)  | [3] |

|                                                                                     |                       |                       |                       |           |     |
|-------------------------------------------------------------------------------------|-----------------------|-----------------------|-----------------------|-----------|-----|
| $[\text{Zn}_2\text{Dy}(\text{L}_1)_2(\text{OAc})_4]\text{ClO}_4$                    | 2.28(2)-<br>2.55(1)   | 1.95(3)-<br>2.40(3)   | 2.02(3)-<br>2.03(3)   | 175.59(1) | [3] |
| $[\text{Zn}_2\text{Dy}(\text{L}_1)_2(\text{OAc})_4]\text{Cl}$                       | 2.27(3)-<br>2.51(3)   | 1.93(4)-<br>2.35(4)   | 1.98(5)-<br>2.11(10)  | 171.51(3) | [3] |
| $[\text{Zn}_2\text{Dy}(\text{L}_1)_2(\text{OAc})_4]\text{PF}_6$                     | 2.28(4)-<br>2.50(3)   | 1.96(4)-<br>2.35(4)   | 2.00(4)-<br>2.02(4)   | 168.76(1) | [3] |
| $[\text{Zn}_2\text{Dy}(\text{L})(\text{NO}_3)_2(\text{OAc})_2(\text{H}_2\text{O})]$ | 2.298(2)-<br>2.502(2) | 2.026(3)-<br>2.319(3) | 2.014(3)-<br>2.371(3) | 46.59°    | [4] |

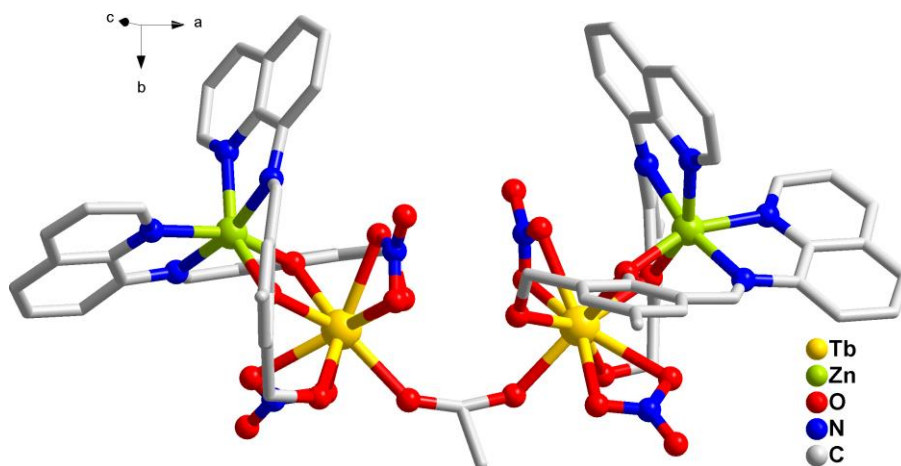

**Figure S5.** Molecular Structure of **5**. (Nitrate ion and Hydrogen atoms are omitted for clarity)

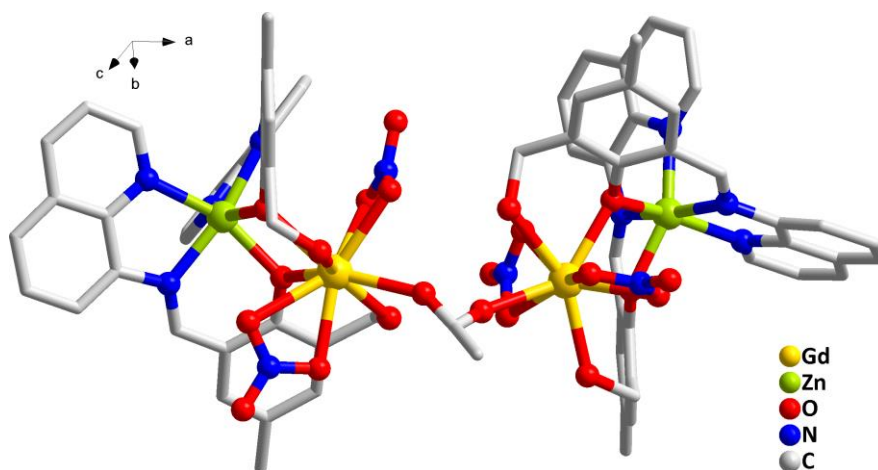

**Figure S6.** Molecular Structure of **6**. (Nitrate ion and Hydrogen atoms are omitted for clarity)

**Table S5.** Selected bond distances (Å) and bond angles (°) parameters for **4**.

| <b>Bond Lengths around Dysprosium (1)</b> |          | <b>Bond Lengths around Zinc (2)</b> |            |
|-------------------------------------------|----------|-------------------------------------|------------|
| Dy(1)-O(3)                                | 2.400(7) | Zn(2)-O(6)                          | 2.134(4)   |
| Dy(1)-O(2)                                | 2.298(8) | Zn(2)-O(8)                          | 2.094(5)   |
| Dy(1)-O(1)                                | 2.414(6) | Zn(2)-N(5)                          | 2.110(6)   |
| Dy (1)-O(4)                               | 2.344(6) | Zn(2)-N(6)                          | 2.239(6)   |
| Dy(1)-O(21)                               | 2.311(8) | Zn(2)-N(8)                          | 2.231(8)   |
| Dy(1)-O(12)                               | 2.442(6) | Zn(2)-N(7)                          | 2.115(6)   |
| Dy(1)-O(13)                               | 2.643(8) | <b>Bond angles</b>                  |            |
| Dy(1)-O(9)                                | 2.428(9) | Zn(1)-O(4)-Dy(1)                    | 106.5(2)   |
| Dy(1)-O(11)                               | 2.50(1)  | Zn(1)-O(2)-Dy(1)                    | 108.1(2)   |
| <b>Bond Lengths around Dysprosium (2)</b> |          | Zn(2)-O(6)-Dy(2)                    | 104.84(19) |
| Dy(2)-O(6)                                | 2.368(5) | Zn(2)-O(8)-Dy(1)                    | 108.4(2)   |
| Dy(2)-O(8)                                | 2.306(4) |                                     |            |
| Dy(2)-O(22)                               | 2.340(5) |                                     |            |
| Dy2)-O(7)                                 | 2.393(6) |                                     |            |
| Dy(2)-O(5)                                | 2.409(6) |                                     |            |
| Dy(2)-O(19)                               | 2.539(6) |                                     |            |
| Dy(2)-O(15)                               | 2.509(6) |                                     |            |
| Dy(2)-O(18)                               | 2.426(6) |                                     |            |
| Dy(2)-O(17)                               | 2.524(6) |                                     |            |
| <b>Bond Lengths around Zinc (1)</b>       |          |                                     |            |
| Zn(1)-O(4)                                | 2.097(8) |                                     |            |
| Zn(1)-O(2)                                | 2.099(6) |                                     |            |
| Zn(1)-N(3)                                | 2.128(7) |                                     |            |
| Zn(1)-N(4)                                | 2.21(1)  |                                     |            |
| Zn(1)-N(2)                                | 2.206(9) |                                     |            |
| Zn(2)-N(1)                                | 2.122(9) |                                     |            |

**Table S6.** Selected bond distances (Å) and bond angles (°) parameters for **5**.

| <b>Bond Lengths around Terbium (1)</b> |          | <b>Bond Lengths around Zinc* (2)</b> |          |
|----------------------------------------|----------|--------------------------------------|----------|
| Tb(1)-O(8)                             | 2.565(6) | Zn(1)-O(2)                           | 2.096(4) |
| Tb(1)-O(2)                             | 2.314(4) | Zn(1)-O(4)                           | 2.105(3) |
| Tb(1)-O(1)                             | 2.402(4) | Zn(1)-N(1)                           | 2.129(5) |
| Tb (1)-O(4)                            | 2.309(4) | Zn(1)-N(2)                           | 2.196(5) |
| Tb(1)-O(3)                             | 2.450(4) | Zn(1)-N(3)                           | 2.126(6) |
|                                        |          | Zn(2)-N(4)                           | 2.182(5) |

|                                         |          |                    |            |
|-----------------------------------------|----------|--------------------|------------|
| Tb(1)-O(5)                              | 2.467(6) | <b>Bond angles</b> |            |
| Tb(1)-O(6)                              | 2.530(5) | Zn(1)-O(2)-Tb(1)   | 106.51(2)  |
| Tb(1)-O(11A)                            | 2.351(9) | Zn(1)-O(4)-Tb(1)   | 106.40(15) |
| Tb(1)-O(9)                              | 2.428(5) | Zn(1)-O(2)-Tb(2)   | 106.51(2)  |
|                                         |          | Zn(1)-O(4)-Tb(2)   | 106.40(15) |
| <b>Bond Lengths around Terbium* (2)</b> |          |                    |            |
| Tb(2)-O(8)                              | 2.565(6) |                    |            |
| Tb(2)-O(2)                              | 2.314(4) |                    |            |
| Tb(2)-O(1)                              | 2.402(4) |                    |            |
| Tb (1)-O(4)                             | 2.309(4) |                    |            |
| Tb(2)-O(3)                              | 2.450(4) |                    |            |
| Tb(2)-O(5)                              | 2.467(6) |                    |            |
| Tb(2)-O(6)                              | 2.530(5) |                    |            |
| Tb(2)-O(11B)                            | 2.36(1)  |                    |            |
| Tb(2)-O(9)                              | 2.428(5) |                    |            |
| <b>Bond Lengths around Zinc (1)</b>     |          |                    |            |
| Zn(1)-O(2)                              | 2.096(4) |                    |            |
| Zn(1)-O(4)                              | 2.105(3) |                    |            |
| Zn(1)-N(1)                              | 2.129(5) |                    |            |
| Zn(1)-N(2)                              | 2.196(5) |                    |            |
| Zn(1)-N(3)                              | 2.126(6) |                    |            |
| Zn(2)-N(4)                              | 2.182(5) |                    |            |

\* Symmetry transformations used to generate equivalent atoms: (\*) 1-x, y, 0.5-z.

**Table S7.** Selected bond distances (Å) and bond angles (°) parameters for **6**.

|                                            |          |                                      |            |
|--------------------------------------------|----------|--------------------------------------|------------|
| <b>Bond Lengths around Gadolinium (1)</b>  |          | <b>Bond Lengths around Zinc* (2)</b> |            |
| Gd(1)-O(8)                                 | 2.564(7) | Zn(2)-O(2)                           | 2.096(4)   |
| Gd(1)-O(2)                                 | 2.314(4) | Zn(2)-O(4)                           | 2.105(4)   |
| Gd(1)-O(1)                                 | 2.401(5) | Zn(2)-N(1)                           | 2.128(5)   |
| Gd(1)-O(4)                                 | 2.310(4) | Zn(2)-N(2)                           | 2.196(5)   |
| Gd(1)-O(3)                                 | 2.450(4) | Zn(2)-N(3)                           | 2.124(6)   |
| Gd(1)-O(5)                                 | 2.468(7) | Zn(2)-N(4)                           | 2.180(5)   |
| Gd(1)-O(6)                                 | 2.531(5) | <b>Bond angles</b>                   |            |
| Gd(1)-O(11A)                               | 2.36(1)  | Zn(1)-O(2)-Gd(1)                     | 106.50(16) |
| Gd(1)-O(9)                                 | 2.429(5) | Zn(1)-O(4)-Gd(1)                     | 106.35(15) |
| <b>Bond Lengths around Gadolinium* (2)</b> |          | Zn(1)-O(2)-Gd(2)                     | 106.50(16) |
| Gd(2)-O(8)                                 | 2.564(7) | Zn(1)-O(4)-Gd(2)                     | 106.35(15) |
| Gd(2)-O(2)                                 | 2.314(4) |                                      |            |
| Gd(2)-O(1)                                 | 2.401(5) |                                      |            |

|                                     |          |
|-------------------------------------|----------|
| Gd(1)-O(4)                          | 2.310(4) |
| Gd(2)-O(3)                          | 2.450(4) |
| Gd(2)-O(5)                          | 2.468(7) |
| Gd(2)-O(6)                          | 2.531(5) |
| Gd(2)-O(11B)                        | 2.3512   |
| Gd(2)-O(9)                          | 2.429(5) |
| <b>Bond Lengths around Zinc (1)</b> |          |
| Zn(1)-O(2)                          | 2.096(4) |
| Zn(1)-O(4)                          | 2.105(4) |
| Zn(1)-N(1)                          | 2.128(5) |
| Zn(1)-N(2)                          | 2.196(5) |
| Zn(1)-N(3)                          | 2.124(6) |
| Zn(2)-N(4)                          | 2.180(5) |

\* Symmetry transformations used to generate equivalent atoms: (\*) 1-x, y, 0.5-z.

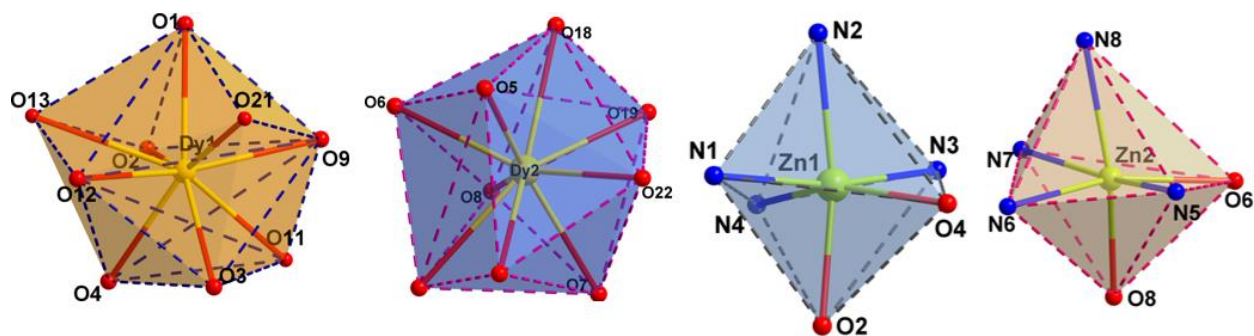

**Figure S7.** Coordination geometry around metal ions in tetranuclear complex.



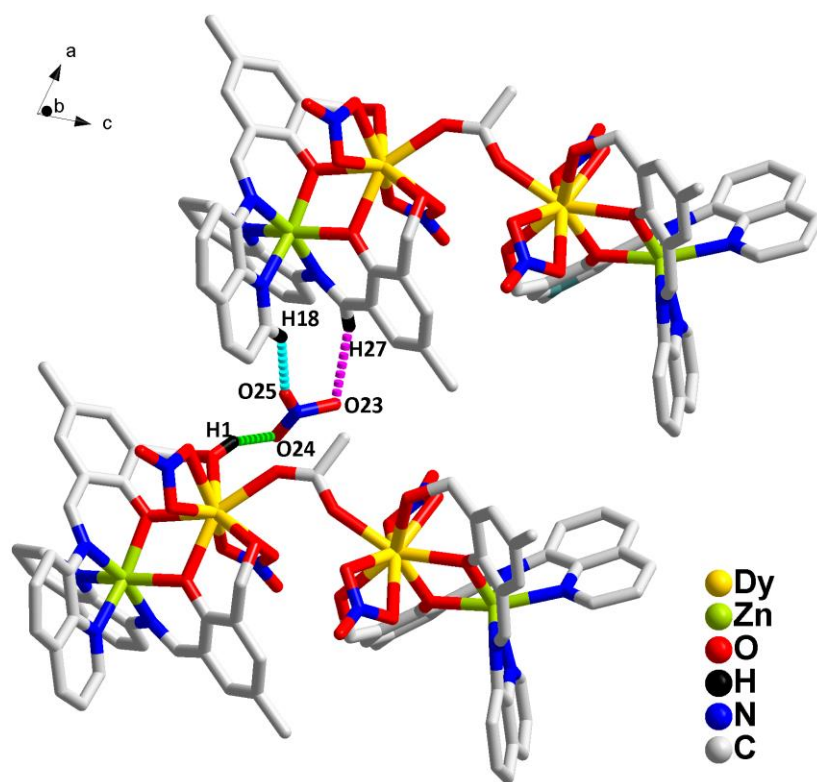

**Figure S8.** Packing diagram of **4**.

**Table S8.** Results of the SHAPE measurements for all atoms in Complex 1 and 4.

| Complex 1 |        |        |         |        |         |       |           |           |           |          |          |        |          |  |
|-----------|--------|--------|---------|--------|---------|-------|-----------|-----------|-----------|----------|----------|--------|----------|--|
| Sites     | OP-8   | HPY-8  | HBPY-8  | CU-8   | SAP R-8 | TDD-8 | JGBF-8    | JETBP Y-8 | JBTP R-8  | BTP R-8  | JSD-8    | TT-8   | ETBP Y-8 |  |
| Dy1       | 28.79  | 22.960 | 17.542  | 10.149 | 0.423   | 2.394 | 16.033    | 27.377    | 2.984     | 2.344    | 5.329    | 10.534 | 23.072   |  |
| Sites     |        | PP-5   |         | vOC-5  |         |       | TBPY-5    |           |           | SPY-5    |          |        | JTBPY-5  |  |
| Zn1       |        | 28.435 |         | 5.140  |         |       | 1.397     |           |           | 3.744    |          |        | 3.568    |  |
| Zn2       |        | 28.379 |         | 4.882  |         |       | 1.626     |           |           | 3.326    |          |        | 3.721    |  |
| Complex 4 |        |        |         |        |         |       |           |           |           |          |          |        |          |  |
| Sites     | EP-9   | OPY-9  | HBP Y-9 | JTC-9  | JCC U-9 | CCU-9 | JCSA PR-9 | CSAP R-9  | JTC TPR-9 | TCT PR-9 | JTDI C-9 | HH-9   | MFF-9    |  |
| Dy1       | 36.354 | 22.435 | 17.263  | 15.550 | 11.058  | 9.103 | 3.529     | 3.044     | 4.907     | 3.761    | 13.260   | 7.046  | 2.204    |  |
| Dy2       | 35.443 | 22.325 | 16.511  | 15.253 | 10.560  | 9.526 | 2.772     | 2.094     | 4.105     | 3.064    | 12.714   | 8.369  | 1.544    |  |
| Sites     |        | HP-6   |         | PPY-6  |         |       | OC-6      |           |           | TPR-6    |          |        | JPPY-6   |  |
| Zn1       |        | 33.202 |         | 18.289 |         |       | 3.747     |           |           | 7.540    |          |        | 22.496   |  |

\*Abbreviation used: OP-8:Octagon, HPY-8:Heptagonal pyramid, HBPY-8:Hexagonal bipyramid, CU-8:Cube, SAPR-8:Square antiprism, TDD-8:Triangular dodecahedron, JGBF-8:Johnson gyrobifastigium J26, JETBPY-8:Johnson elongated triangular bipyramid J14, JBTPR-8:Biaugmented trigonal prism J50, BTPR-8:Biaugmented trigonal prism, JSD-8 : Snub diphendoid J84, TT-8: Triakis tetrahedron, ETBPY-8:Elongated trigonal bipyramid, EP-9:Enneagon, OPY-9:Octagonal pyramid, HBPY-9:Heptagonal bipyramid, JTC-9:Johnson triangular cupola J3, JCCU-9:Capped cube J8, CCU-9:Spherical-relaxed capped cube, JCSAPR-9:Capped square antiprism J10, CSAPR-9:Spherical capped square antiprism, JTCTPR-9:Tricapped trigonal prism J51, TCTPR-9:Spherical tricapped trigonal prism, JTDIC-9:Tridiminished icosahedron J63, HH-9:Hula-hoop, MFF-9:Muffin, PP-5: Pentagon, vOC-5:Vacant octahedron, TBPY-5:Trigonal bipyramid, SPY-5:Spherical square pyramid, JTBPY-5:Johnson trigonal bipyramid J12, HP-6:Hexagon, PPY-6: Pentagonal pyramid, OC-6:Octahedron, TPR-6:Trigonal prism, JPPY-6:Johnson pentagonal pyramid J2

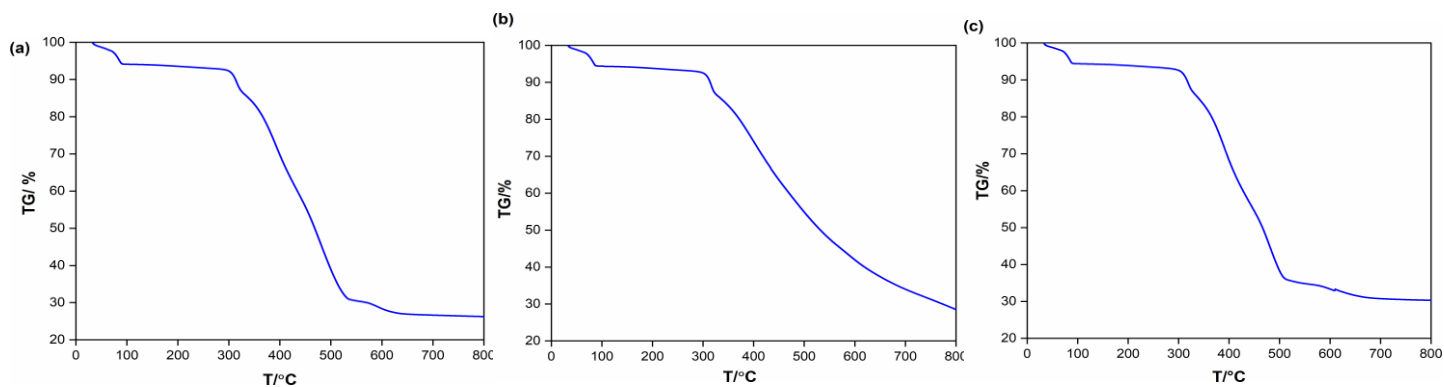

**Figure S9.** TGA of complex **1-3**.

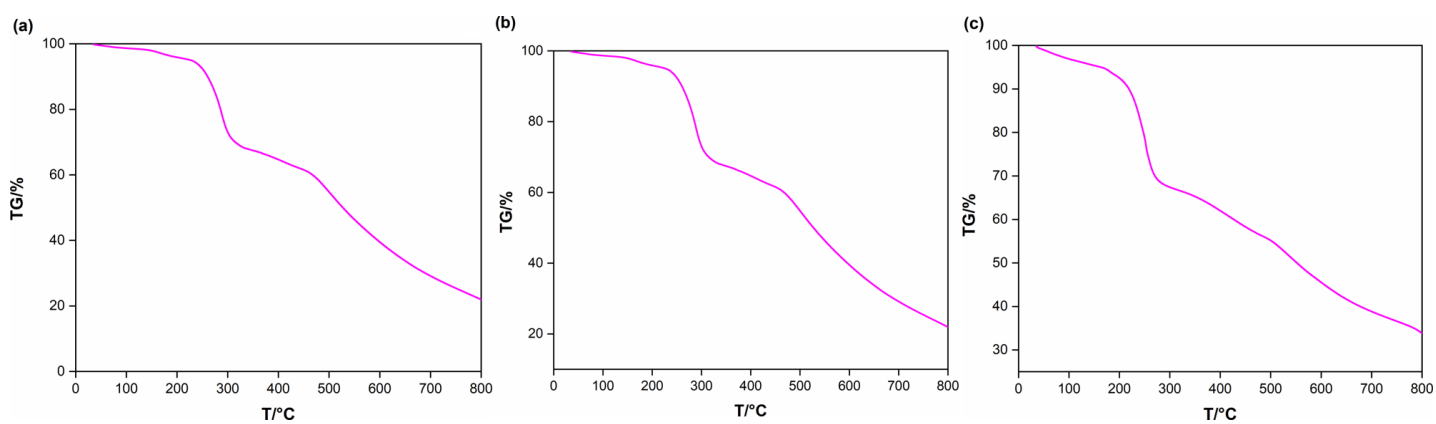

**Figure S10.** TGA of complex **4-6**.

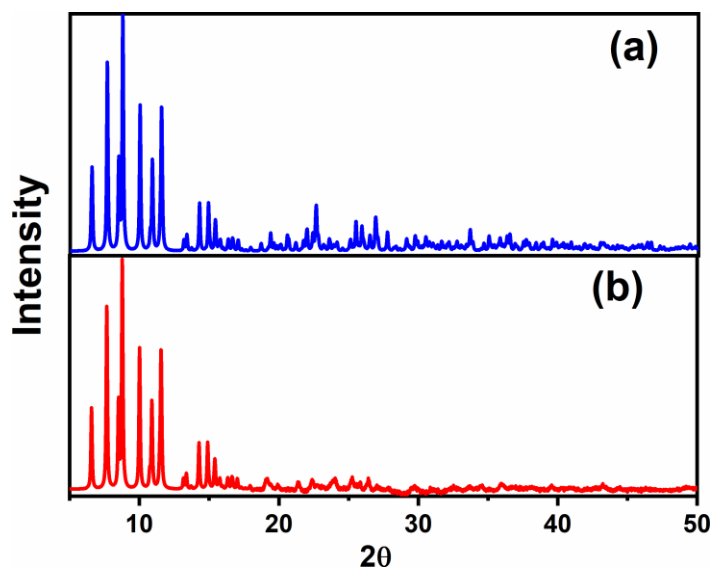

**Figure S11.** (a) PXRD patterns corresponding to stimulated single crystal data for complex **1**.  
(b) Experimental PXRD data corresponding to the complex **1**.

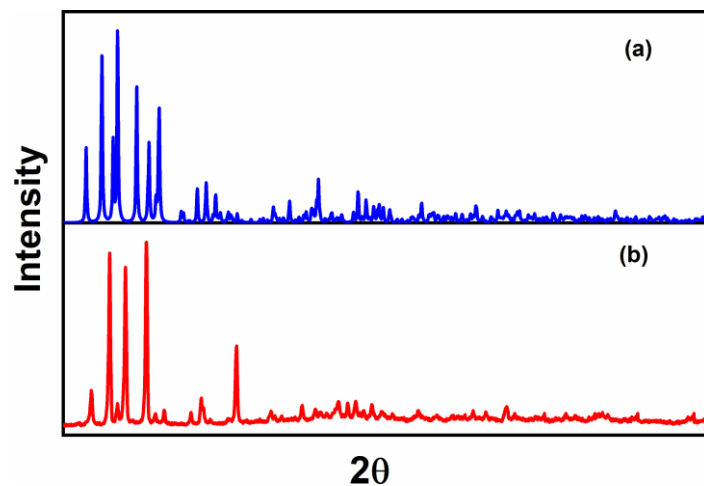

**Figure S12.** (a) PXRD patterns corresponding to stimulated single crystal data for complex 2.  
(b) Experimental PXRD data corresponding to the complex 2.

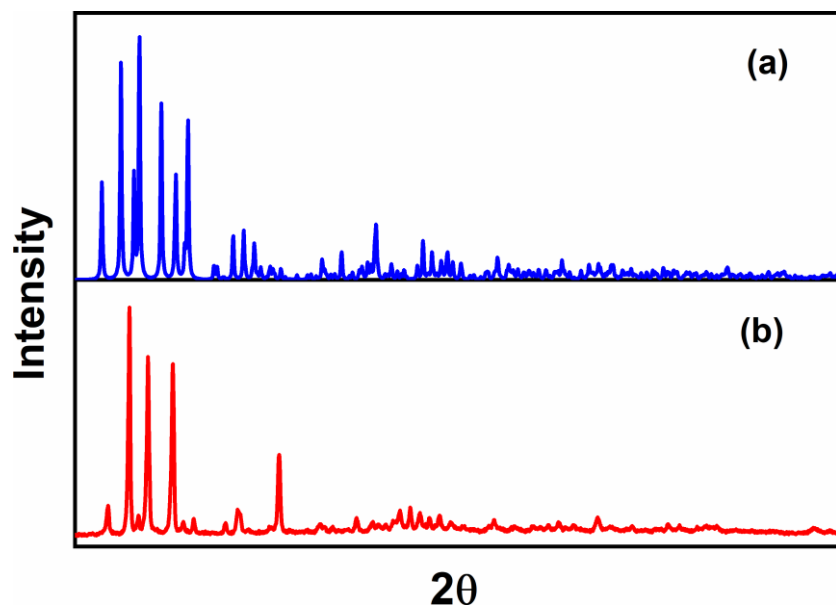

**Figure S13.** (a) PXRD patterns corresponding to stimulated single crystal data for complex 3.  
(b) Experimental PXRD data corresponding to the complex 3.

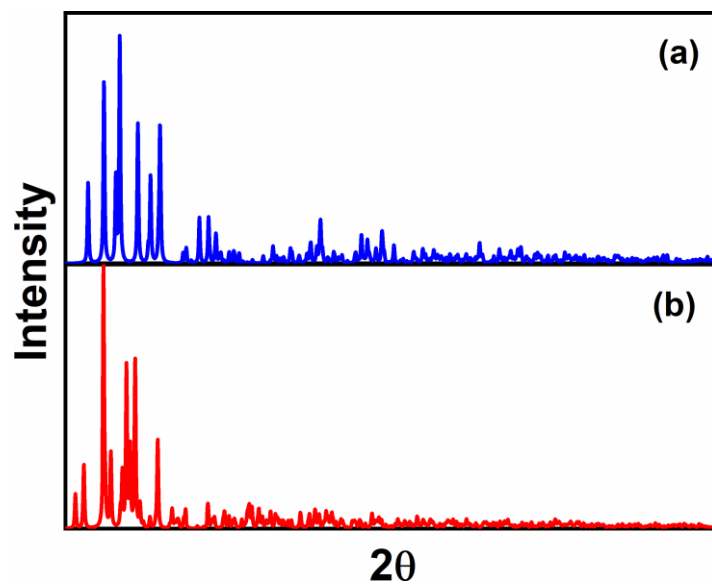

**Figure S14.** (a) PXRD patterns corresponding to stimulated single crystal data for complex **4**.  
(b) Experimental PXRD data corresponding to the complex **4**.

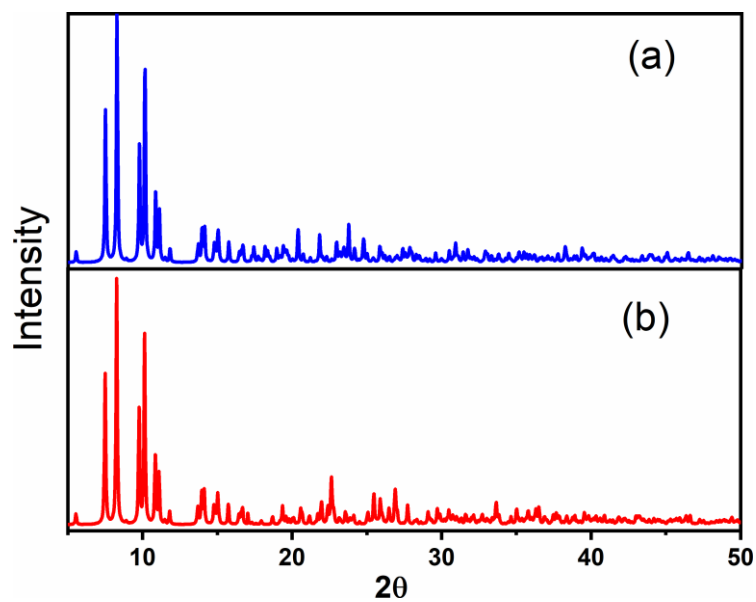

**Figure S15.** (a) PXRD patterns corresponding to stimulated single crystal data for complex **5**.  
(b) Experimental PXRD data corresponding to the complex **5**.

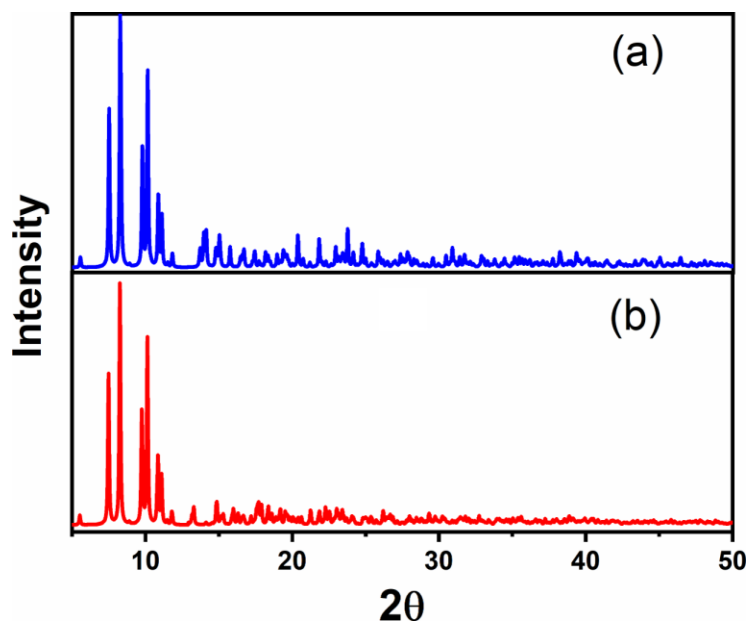

**Figure S16.** (a) PXRD patterns corresponding to stimulated single crystal data for complex **6**.

(b) Experimental PXRD data corresponding to the complex **6**.

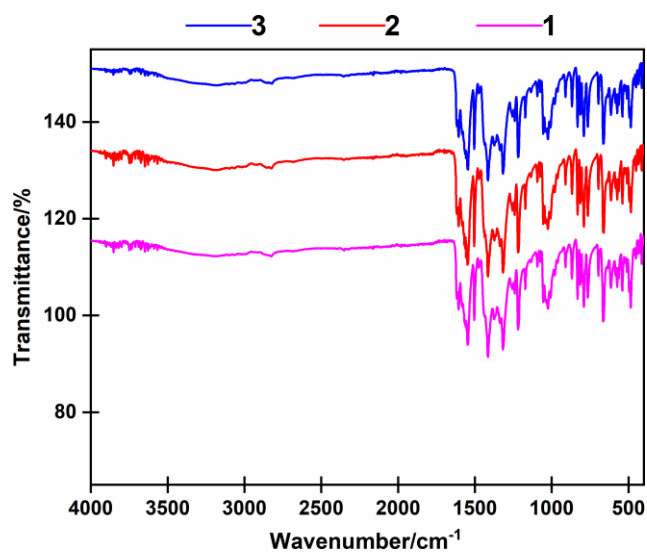

**Figure S17.** IR of complex 1-3.

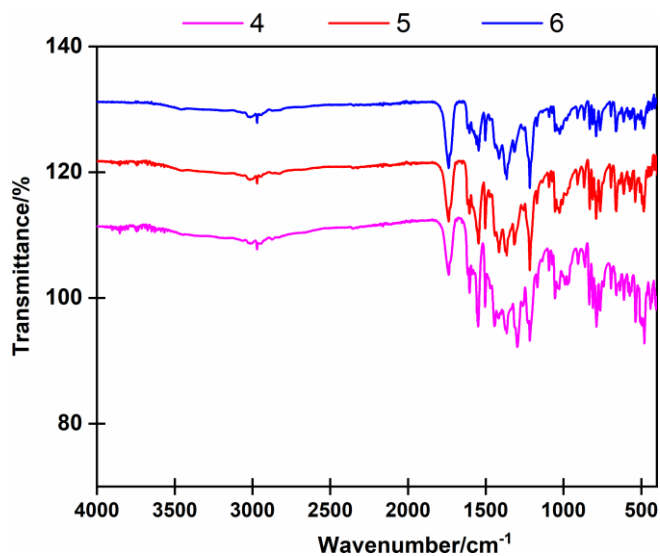

**Figure S18.** IR of complex **4-6**.

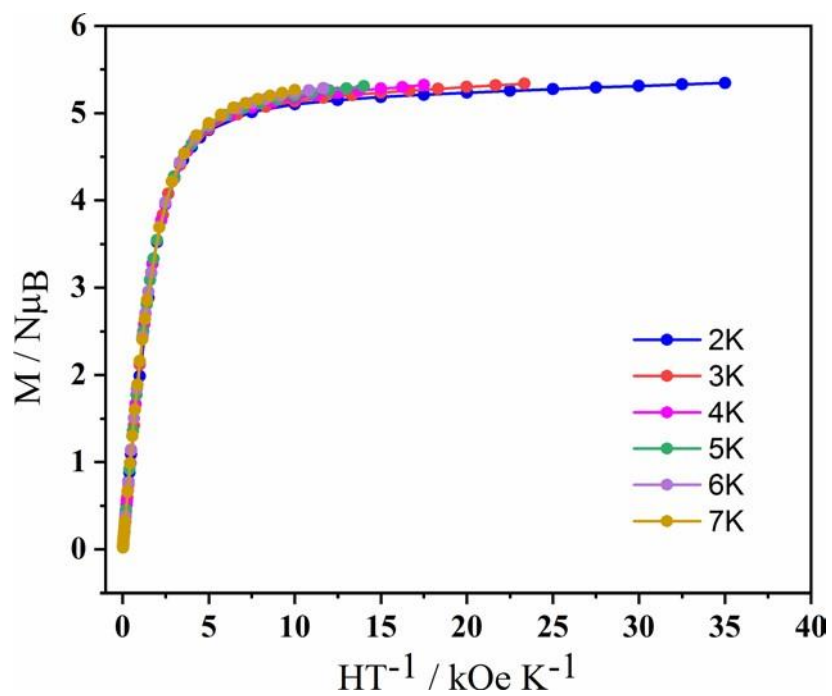

**Figure S19.**  $M$  vs.  $H/T$  measurements for compound **1**.

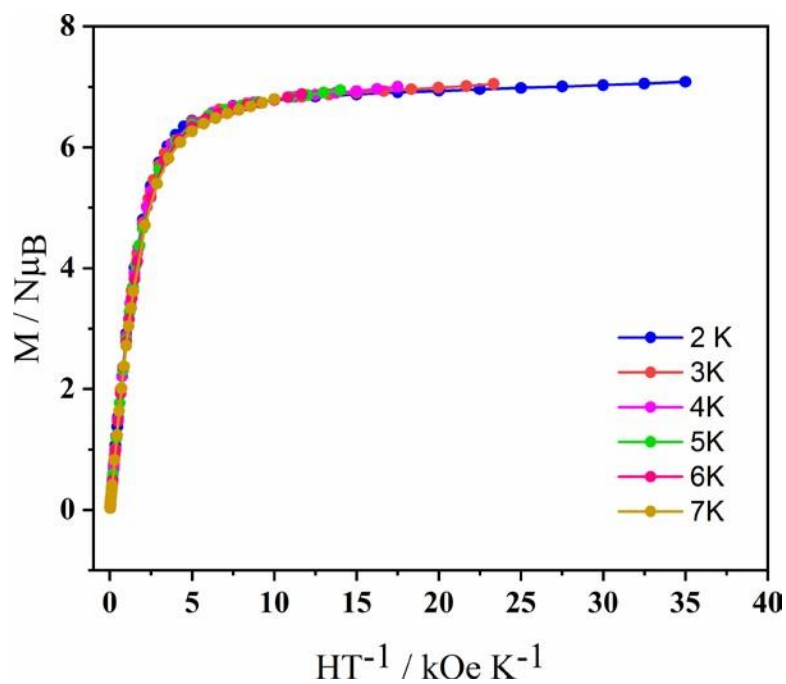

**Figure S20.**  $M$  vs.  $H/T$  measurements for compound 2.

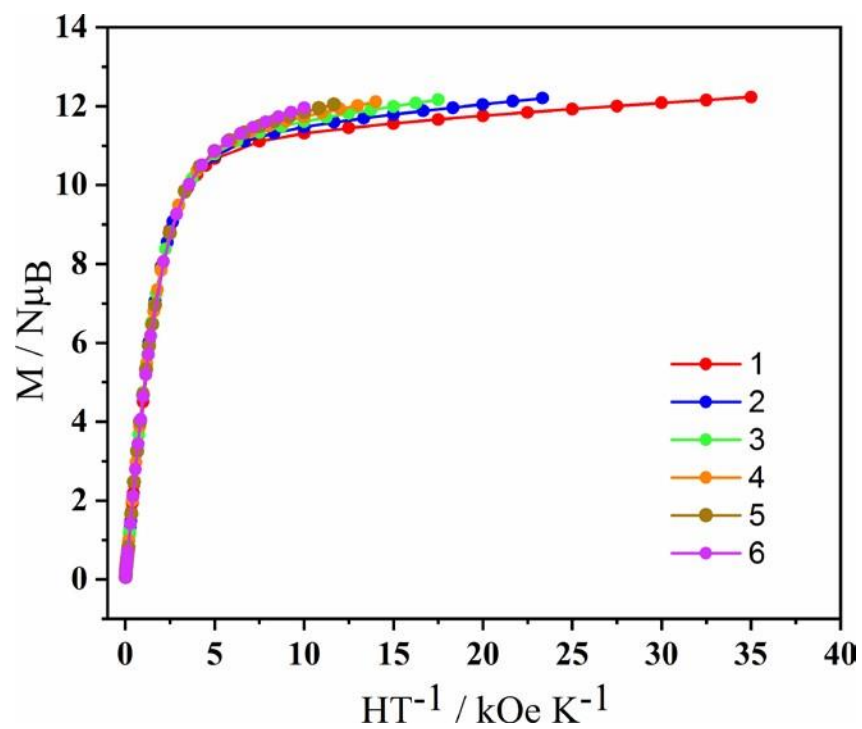

**Figure S21.**  $M$  vs.  $H/T$  measurements for compound 4.



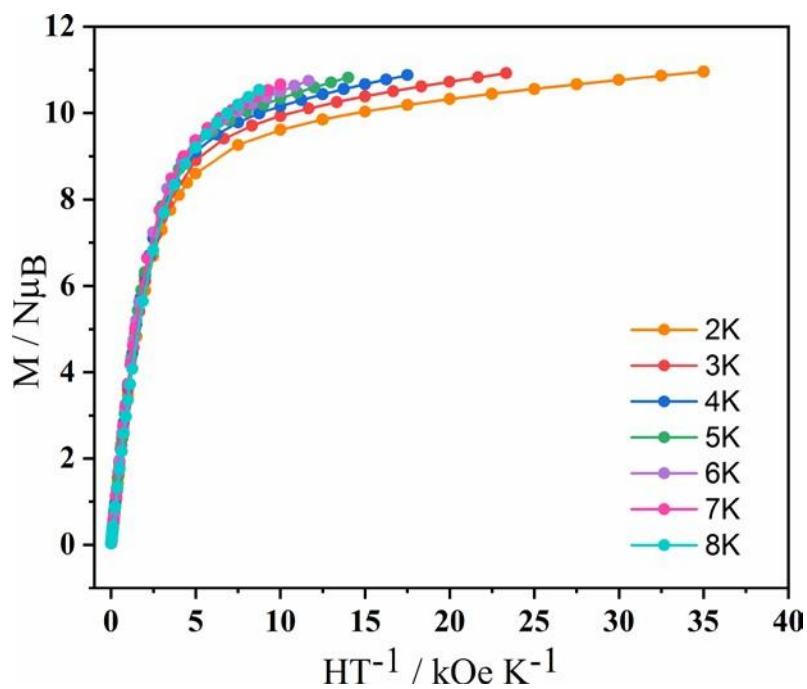

**Figure S22.**  $M$  vs.  $H/T$  measurements for compound 5.

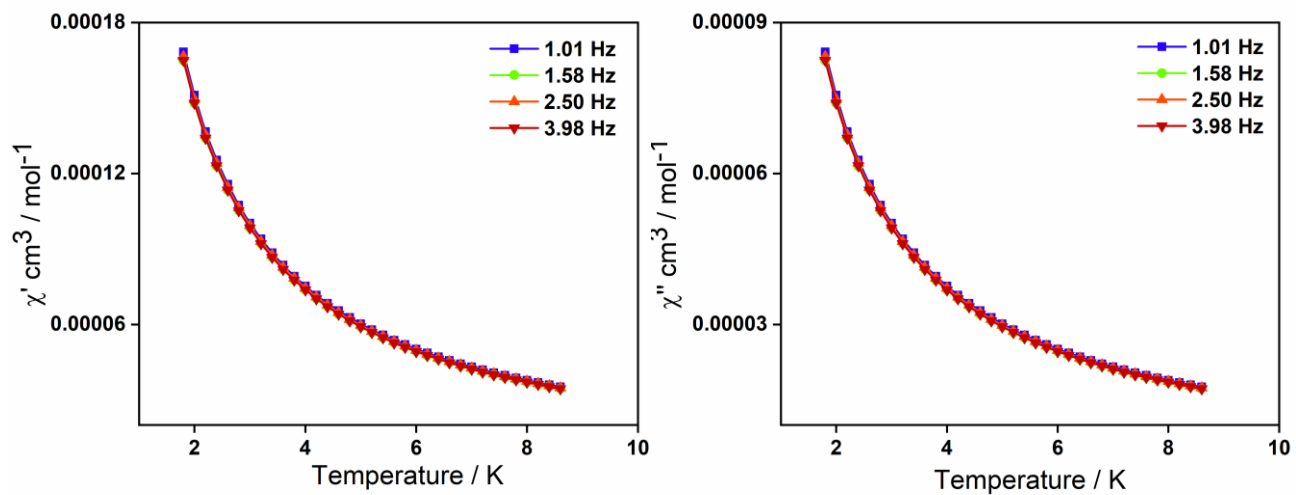

**Figure S23.** Temperature dependence of out-of-phase ac magnetic susceptibility signals under 0 Oe dc field for 2.

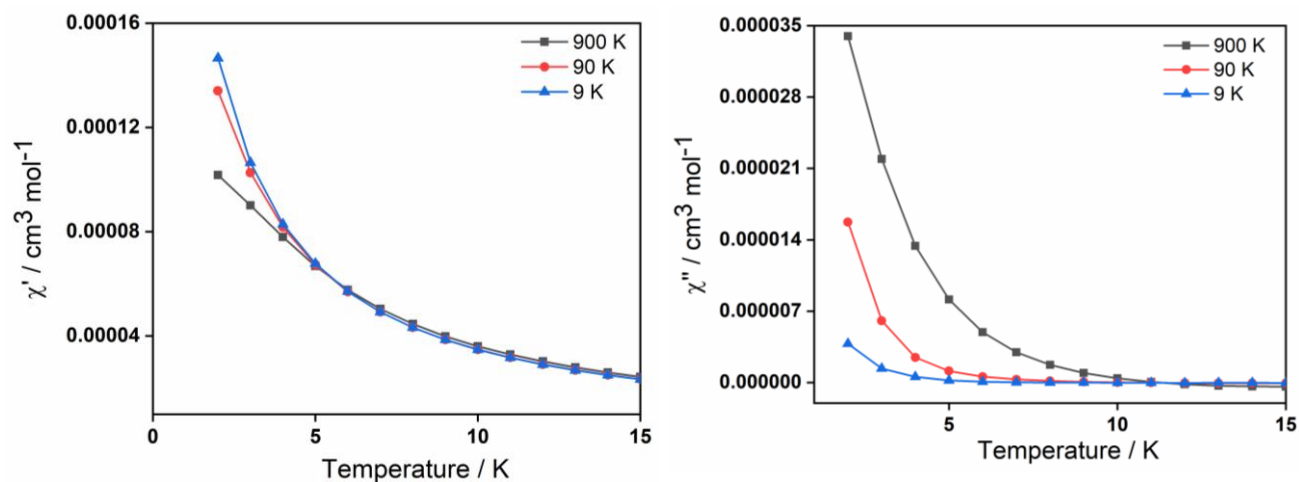

**Figure S24.** Temperature dependence of out-of-phase ac magnetic susceptibility signals under 1500 Oe dc field for **2**.

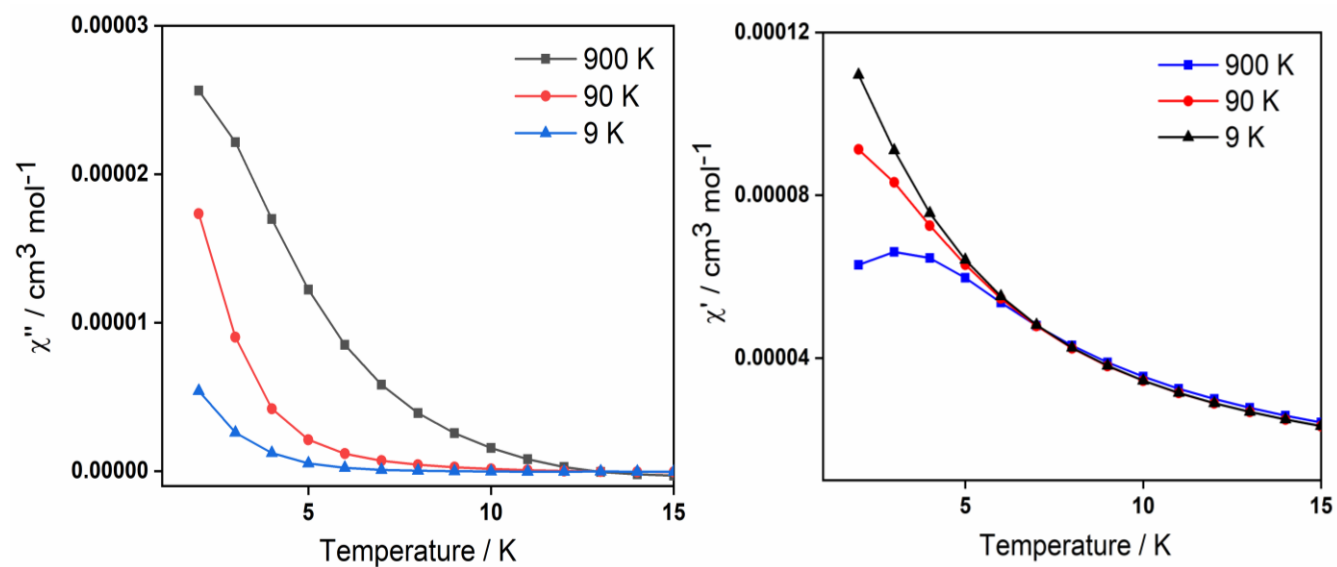

**Figure S25.** Temperature dependence of out-of-phase ac magnetic susceptibility signals under 2500 Oe dc field for **2**.

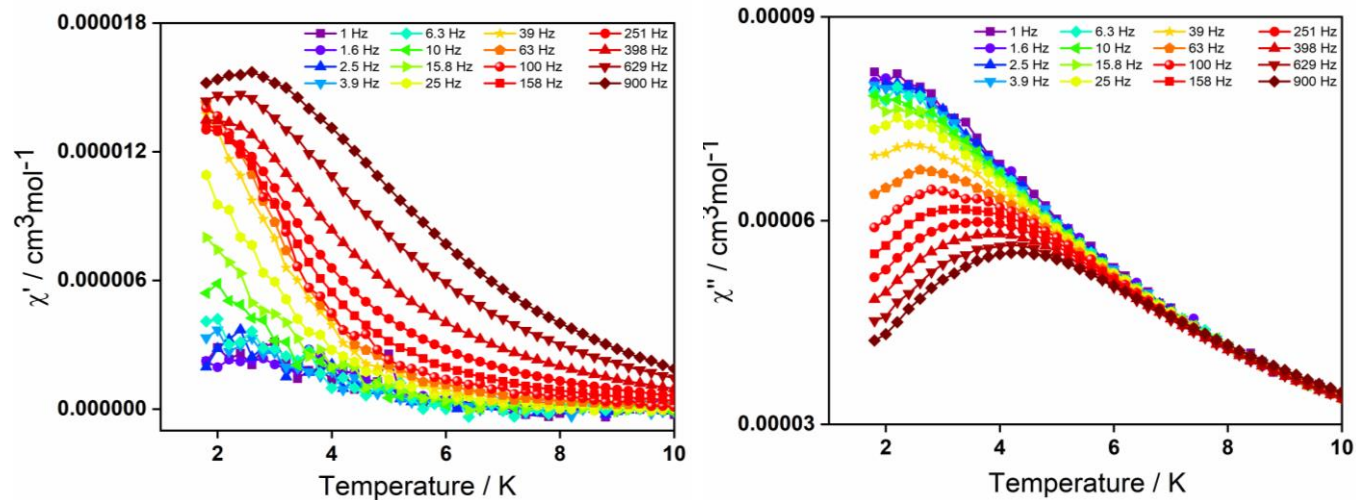

**Figure S26.** Temperature dependence of out-of-phase ac magnetic susceptibility signals under 3500 Oe dc field for **2**.

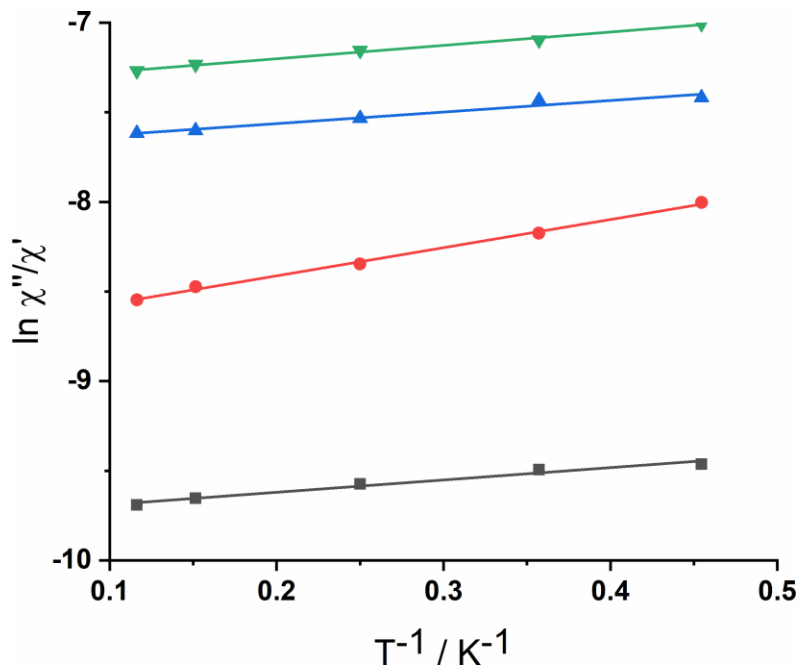

**Figure S27.**  $\ln(\chi''/\chi')$  vs.  $T^{-1}$  plots at different frequencies; the lines represent the fitting curves for complex **2**.

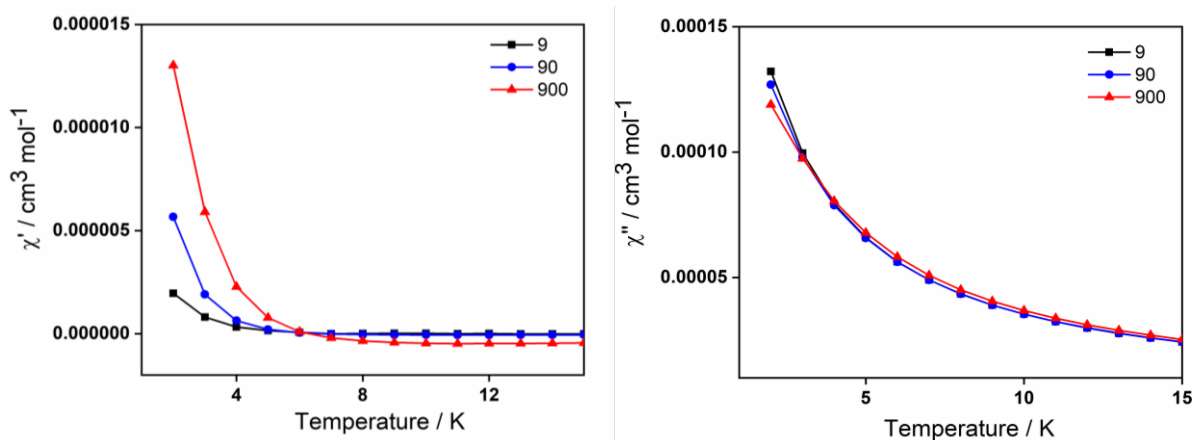

**Figure S28.** Temperature dependence of out-of-phase ac magnetic susceptibility signals under 2500 Oe dc field for **5**.

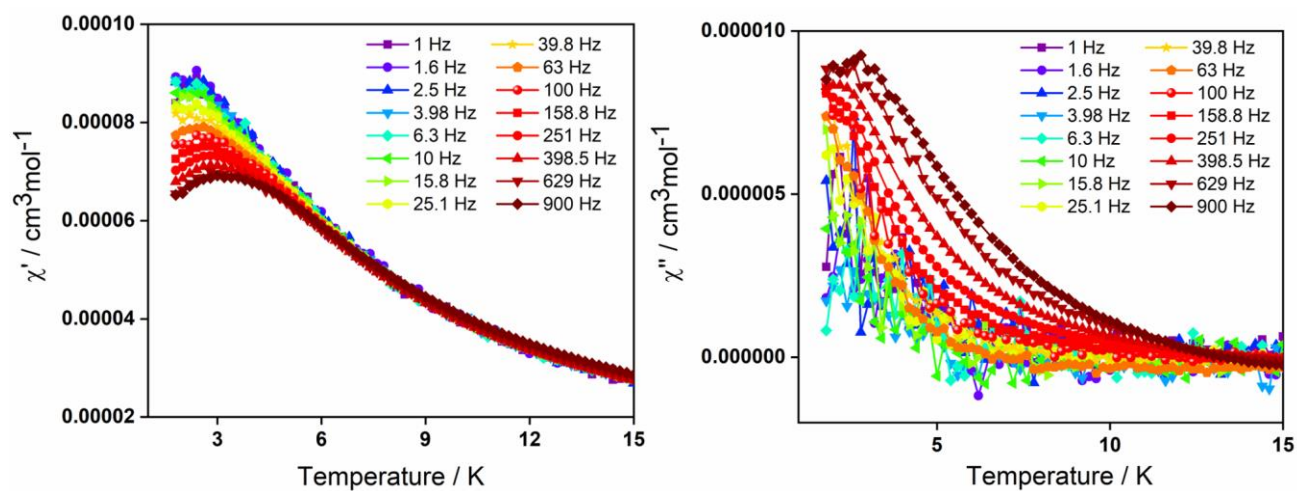

**Figure S29.** Temperature dependence of out-of-phase ac magnetic susceptibility signals under 3500 Oe dc field for **5**.

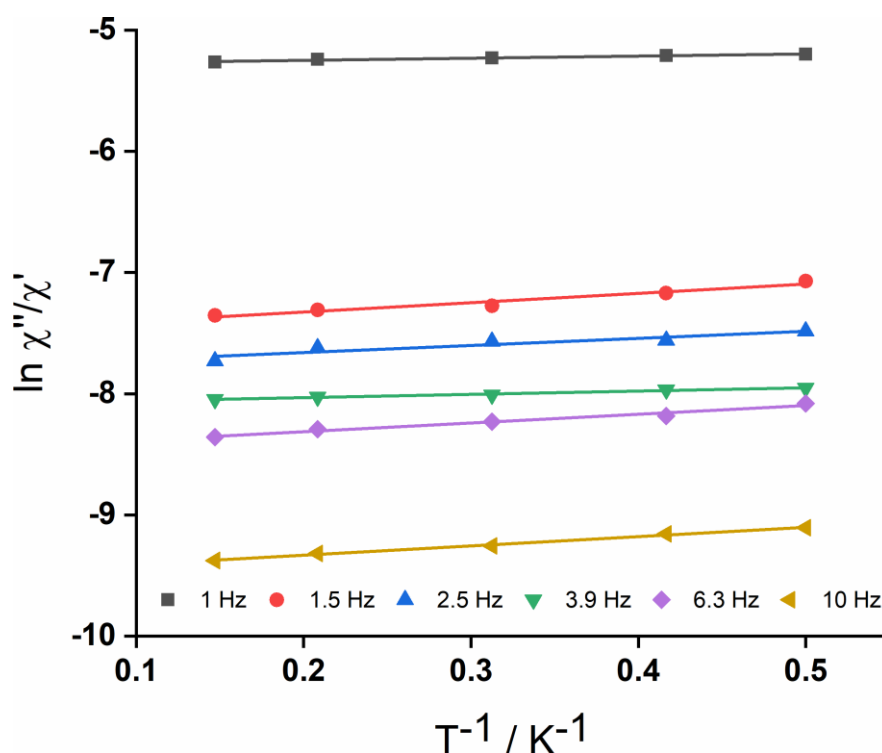

**Figure S30.**  $\ln(\chi''/\chi')$  vs.  $T^{-1}$  plots at different frequencies; the lines represent the fitting curves for complex **5**.

**Table S9.** List of magnetic properties of selected trinuclear and tetranuclear complexes from the literature

| Compounds                                                                                                                                                                                                        | Nuclearity | Magnetization behavior | Energy barrier $U_{\text{eff}}/$                                                                                       | Reference |
|------------------------------------------------------------------------------------------------------------------------------------------------------------------------------------------------------------------|------------|------------------------|------------------------------------------------------------------------------------------------------------------------|-----------|
| $[\text{Zn}_2\text{Dy}(\text{L})(\text{NO}_3)_3(\text{OH})]$                                                                                                                                                     | Trinuclear | Field induced SMM      | 59 K/ $4.17 \times 10^{-7}$ s                                                                                          | [5]       |
| $[(\text{LZn}(\text{H}_2\text{O}))_2\text{Dy}(\text{H}_2\text{O})](\text{CF}_3\text{SO}_3)_3$<br>( $\text{L}^{2-}$ is the di-deprotonated form of $N,N'$ -2,2-dimethylpropylenedi(3-methoxysalicylideneiminato)) | Trinuclear | SMM                    | At 0 dc field: 96.9 K / $\tau_0 = 2.4 \times 10^{-7}$ s<br>At 1000 dc field: 128.6 K / $\tau_0 = 1.8 \times 10^{-8}$ s | [6]       |
| $[(\text{LZnBr})_2\text{Dy}(\text{H}_2\text{O})](\text{ClO}_4)$                                                                                                                                                  | Trinuclear | SMM                    | At 0 dc field: 146.8 K / $\tau_0 = 9.2 \times 10^{-8}$ s                                                               | [6]       |

|                                                                                                                                                                                                                                                                                                         |              |                   |                                                                                                                                                                                                                                                                                                                |      |
|---------------------------------------------------------------------------------------------------------------------------------------------------------------------------------------------------------------------------------------------------------------------------------------------------------|--------------|-------------------|----------------------------------------------------------------------------------------------------------------------------------------------------------------------------------------------------------------------------------------------------------------------------------------------------------------|------|
| (L <sup>2-</sup> is the di-deprotonated form of <i>N</i> , <i>N'</i> -2,2-dimethylpropylenedi(3-methoxysalicylideneiminato))                                                                                                                                                                            |              |                   | At 1000 dc field: 214.7 K / $\tau_0 = 9.8 \times 10^{-9}$ s                                                                                                                                                                                                                                                    |      |
| [(LZnCl) <sub>2</sub> Dy(H <sub>2</sub> O)](ClO <sub>4</sub> )(MeOH)<br>(L <sup>2-</sup> is the di-deprotonated form of <i>N</i> , <i>N'</i> -2,2-dimethylpropylenedi(3-methoxysalicylideneiminato))                                                                                                    | Trinuclear   | SMM               | At 0 dc field: 146.1 K / $\tau_0 = 9.9 \times 10^{-8}$ s<br>At 1000 dc field: 202.4 K / $\tau_0 = 1.5 \times 10^{-8}$ s                                                                                                                                                                                        | [6]  |
| [Zn <sub>2</sub> Dy(LH <sub>3</sub> ) <sub>4</sub> ]<br>LH <sub>4</sub> = [2-(2-hydroxy-3-(hydroxymethyl)-5-methylbenzylideneamino)-2-methylpropane-1,3-diol]                                                                                                                                           | Trinuclear   | Field induced SMM | 67 K / $\tau_0 = 4.5 \times 10^{-8}$ s                                                                                                                                                                                                                                                                         | [7]  |
| [Zn <sub>2</sub> Dy(L <sub>1</sub> ) <sub>2</sub> (OAc) <sub>4</sub> ](X) where X = (NO <sub>3</sub> ) <sub>0.92</sub> (Br) <sub>0.08</sub> , ClO <sub>4</sub> , Cl and PF <sub>6</sub>                                                                                                                 | Trinuclear   | Field induced SMM | For (NO <sub>3</sub> ) <sub>0.92</sub> (Br) <sub>0.08</sub> : 25.4 cm <sup>-1</sup> / $5.2 \times 10^{-8}$ ; For ClO <sub>4</sub> : 12.9 cm <sup>-1</sup> / $5.8 \times 10^{-9}$ ; For Cl: 14.08 cm <sup>-1</sup> / $3.0 \times 10^{-8}$ ; For PF <sub>6</sub> : 55.5 cm <sup>-1</sup> / $1.0 \times 10^{-10}$ | [8]  |
| [Zn <sub>2</sub> Dy <sub>2</sub> ( $\mu_3$ -L') <sub>2</sub> ( $\mu$ -sal) <sub>2</sub> (NO <sub>3</sub> )(CH <sub>3</sub> OH)](NO <sub>3</sub> )·5CH <sub>3</sub> OH<br>H <sub>2</sub> L = <i>N,N'</i> -dimethyl- <i>N,N'</i> -bis(2-hydroxy-3-formyl-5-bromobenzyl)ethylene diamine; sal = salicylate | Tetranuclear | No SMM behavior   | --                                                                                                                                                                                                                                                                                                             | [9]  |
| {( $\mu_3$ -CO <sub>3</sub> ) <sub>2</sub> [Zn( $\mu$ -L)Dy(NO <sub>3</sub> )] <sub>2</sub> }·4CH <sub>3</sub> OH; H <sub>2</sub> L = <i>N,N',N''</i> -trimethyl- <i>N,N''</i> -bis(2-hydroxy-3-methoxy-5-methylbenzyl)diethylenetriamine                                                               | Tetranuclear | Field induced SMM | 24 K / $\tau_0 = 2.3 \times 10^{-6}$ s                                                                                                                                                                                                                                                                         | [10] |

|                                                                                                                                                                                                                                                                                                                                                                                                                                                                                                                                                                                                                                                                                                                                                                                                                                                                                                                                                                                                                                                                                                                                                                                                                                                                              |              |                    |                                                                                                                                                                                                                                                                                                                                                                                                                                                                         |      |
|------------------------------------------------------------------------------------------------------------------------------------------------------------------------------------------------------------------------------------------------------------------------------------------------------------------------------------------------------------------------------------------------------------------------------------------------------------------------------------------------------------------------------------------------------------------------------------------------------------------------------------------------------------------------------------------------------------------------------------------------------------------------------------------------------------------------------------------------------------------------------------------------------------------------------------------------------------------------------------------------------------------------------------------------------------------------------------------------------------------------------------------------------------------------------------------------------------------------------------------------------------------------------|--------------|--------------------|-------------------------------------------------------------------------------------------------------------------------------------------------------------------------------------------------------------------------------------------------------------------------------------------------------------------------------------------------------------------------------------------------------------------------------------------------------------------------|------|
| [Zn <sub>2</sub> Ln <sub>2</sub> L <sub>2</sub> Cl <sub>2</sub> (acetate) <sub>4</sub> (MeOH) <sub>2</sub> ]<br>H <sub>2</sub> L = 2-methoxy-6-<br>[{2-(2-<br>hydroxyethylamino)et<br>hylimino}-<br>methyl]phenol                                                                                                                                                                                                                                                                                                                                                                                                                                                                                                                                                                                                                                                                                                                                                                                                                                                                                                                                                                                                                                                            | Tetranuclear | No SMM<br>behavior | --                                                                                                                                                                                                                                                                                                                                                                                                                                                                      | [11] |
| [ZnL <sup>1</sup> Dy(C <sub>2</sub> H <sub>5</sub> O)(qua) <sub>2</sub> (CF <sub>3</sub> SO <sub>3</sub> ) <sub>2</sub> ·2C <sub>2</sub> H <sub>5</sub> OH (1),<br>[ZnL <sup>1</sup> Dy(CH <sub>3</sub> O)(bnz) <sub>2</sub> (CF <sub>3</sub> SO <sub>3</sub> ) <sub>2</sub> ·2CH <sub>3</sub> OH (2),<br>[ZnL <sup>1</sup> Dy(CH <sub>3</sub> O)(aca) <sub>2</sub> (CF <sub>3</sub> SO <sub>3</sub> ) <sub>2</sub> ·2CH <sub>3</sub> OH (3),<br>[ZnL <sup>2</sup> Dy(CH <sub>3</sub> O)(bnz) <sub>2</sub> (CF <sub>3</sub> SO <sub>3</sub> ) <sub>2</sub> ·2CH <sub>3</sub> OH (4),<br>[ZnL <sup>2</sup> Dy(CH <sub>3</sub> O)(aca) <sub>2</sub> (CF <sub>3</sub> SO <sub>3</sub> ) <sub>2</sub> ·2CH <sub>3</sub> OH (5), and<br>[ZnL <sup>3</sup> Dy(CH <sub>3</sub> O)(bnz) <sub>2</sub> (CF <sub>3</sub> SO <sub>3</sub> ) <sub>2</sub> ·2CH <sub>3</sub> OH (6)<br>(HL <sup>1</sup> = N,N'-bis(2-<br>hydroxy-3-<br>methoxybenzylidene)-<br>1,2-<br>phenylenediamine,<br>HL <sup>2</sup> = N,N'-bis(2-<br>hydroxy-3-<br>methoxybenzylidene)-<br>propane-1,2-diamine,<br>HL <sup>3</sup> = N,N'-bis(3-<br>methoxysalicylidene)-<br>1,3-propanediamine,<br>qua = 2-<br>quinolinecarboxylic<br>acid, bnz =<br>benzhydroxamic acid<br>and aca =<br>acetohydroxamic<br>acid) | Tetranuclear | SMM                | $U_{\text{eff}}/k_B = 28.34$ K, $\tau_0 = 1.44 \times 10^{-7}$ s<br>(1), $U_{\text{eff}}/k_B = 27.61$<br>K, $\tau_0 = 4.68 \times 10^{-5}$ s<br>(2), $U_{\text{eff}}/k_B = 34.21$<br>K, $\tau_0 = 9.52 \times 10^{-5}$ s<br>(3), $U_{\text{eff}}/k_B = 61.23$<br>K, $\tau_0 = 9.31 \times 10^{-6}$ s<br>(4), $U_{\text{eff}}/k_B = 34.54$<br>K, $\tau_0 = 6.83 \times 10^{-5}$ s (5)<br>and $U_{\text{eff}}/k_B = 36.03$ K,<br>and $\tau_0 = 9.63 \times 10^{-5}$ s (6) | [12] |

## Materials and Method

Lanthanide salts and Zinc acetate was received from Sigma Aldrich, India. Tetra butyl ammonium hydroxide (TBA-OH) was obtained from SRL Chemicals, India.

## Instrumentation

IR data was recorded with a Diamond ATR module using PerkinElmer Spectrum Two FTIR Spectrometer in the range 450-4500  $\text{cm}^{-1}$ . Elemental analysis was performed using Thermoquest CE instrument CHNS-O, EA/110 model.

NMR spectra were recorded by a JEOL JNM LAMBDA 400 model spectrometer operating at 400 MHz.

## X-Ray Crystallography

X-Ray diffraction was performed on a Rigaku diffractometer with Mo-K $\alpha$  radiation at low temperature ( $\lambda = 0.71073 \text{ \AA}$ ). SMART<sup>[13]</sup> program was used for collecting frames of data and for determining the lattice parameters. SAINT<sup>[13]</sup> program was utilized for obtaining the integration of the intensity of reflections and scaling. SADABS<sup>[14]</sup> was used for absorption correction while SHELXTL<sup>[14,15,16]</sup> was used for space group and structure determination. The figures of complexes were generated using Diamond 3.1e software<sup>[16]</sup>. The structures were solved using direct methods by the program SHELXS-2014<sup>[17]</sup> and Olex-2 software<sup>[18]</sup>. Presence of disordered solvent molecules were removed by using “PLATON/ “SQUEEZE”<sup>[18,19]</sup> program. Total electron per unit cell for **1-3** are 68.2, 396.8, 169.6 respectively. For  $Z = 4$ , the electron count per molecule corresponds to 17.05 for **1** (1 MeOH), 99.2 for **2** (5 MeOH and 1 H<sub>2</sub>O) and 42.4 for **3** (1 MeOH and 1 CHCl<sub>3</sub>). Similarly, total electron per unit cell for **4-6** are 58.1, 312 and 312 respectively. For  $Z = 2$ , the electron count per molecule corresponds to 29.05 for **4** (1 MeOH and



1 H<sub>2</sub>O), 38 for **5** (1 MeOH and 2 H<sub>2</sub>O) and for **6** (1 MeOH and 2 H<sub>2</sub>O). Crystal data and cell parameters are depicted in Table 2. The data can be obtained free of cost from Cambridge Crystallographic Data Centre with the deposition number 2194864-2194869 for **1-6** respectively.

**Table S10.** Details of the data collection and refinement parameters for compounds **1-6**.

|                                    | <b>1</b>                                                                         | <b>2</b>                                                                         | <b>3</b>                                                                         | <b>4</b>                                                                                        | <b>5</b>                                                                                        | <b>6</b>                                                                                        |
|------------------------------------|----------------------------------------------------------------------------------|----------------------------------------------------------------------------------|----------------------------------------------------------------------------------|-------------------------------------------------------------------------------------------------|-------------------------------------------------------------------------------------------------|-------------------------------------------------------------------------------------------------|
| Empirical formula                  | C <sub>42</sub> H <sub>42</sub> DyN <sub>5</sub> O <sub>13</sub> Zn <sub>2</sub> | C <sub>42</sub> H <sub>42</sub> N <sub>5</sub> O <sub>13</sub> TbZn <sub>2</sub> | C <sub>42</sub> H <sub>42</sub> GdN <sub>5</sub> O <sub>13</sub> Zn <sub>2</sub> | C <sub>74</sub> H <sub>63</sub> Dy <sub>2</sub> N <sub>13</sub> O <sub>25</sub> Zn <sub>2</sub> | C <sub>74</sub> H <sub>63</sub> N <sub>13</sub> O <sub>25</sub> Tb <sub>2</sub> Zn <sub>2</sub> | C <sub>74</sub> H <sub>63</sub> Gd <sub>2</sub> N <sub>13</sub> O <sub>25</sub> Zn <sub>2</sub> |
| Formula weight                     | 1118.04                                                                          | 1114.46                                                                          | 1112.79                                                                          | 1990.11                                                                                         | 1982.95                                                                                         | 1979.61                                                                                         |
| Temperature/K                      | 100.01                                                                           | 273.15                                                                           | 273.15                                                                           | 297.65                                                                                          | 100(2)                                                                                          | 100(2)                                                                                          |
| Crystal system                     | monoclinic                                                                       | monoclinic                                                                       | monoclinic                                                                       | triclinic                                                                                       | monoclinic                                                                                      | monoclinic                                                                                      |
| Space group                        | P2 <sub>1</sub> /c                                                               | P2 <sub>1</sub> /c                                                               | P2 <sub>1</sub> /c                                                               | P-1                                                                                             | C2/c                                                                                            | C2/c                                                                                            |
| a/Å                                | 12.027(4)                                                                        | 11.9571(9)                                                                       | 11.9328(10)                                                                      | 11.9906(9)                                                                                      | 36.348(2)                                                                                       | 36.348(2)                                                                                       |
| b/Å                                | 20.800(6)                                                                        | 20.8492(16)                                                                      | 20.8385(18)                                                                      | 15.9962(11)                                                                                     | 12.6844(7)                                                                                      | 12.6844(7)                                                                                      |
| c/Å                                | 18.417(5)                                                                        | 18.1968(15)                                                                      | 18.2495(15)                                                                      | 22.9493(15)                                                                                     | 19.8980(11)                                                                                     | 19.8980(11)                                                                                     |
| α/°                                | 90                                                                               | 90                                                                               | 90                                                                               | 76.896(3)                                                                                       | 90                                                                                              | 90                                                                                              |
| β/°                                | 106.674(8)                                                                       | 106.113(2)                                                                       | 106.152(2)                                                                       | 75.140(3)                                                                                       | 118.758(2)                                                                                      | 118.758(2)                                                                                      |
| γ/°                                | 90                                                                               | 90                                                                               | 90                                                                               | 83.179(4)                                                                                       | 90                                                                                              | 90                                                                                              |
| Volume/Å <sup>3</sup>              | 4414(2)                                                                          | 4358.2(6)                                                                        | 4358.8(6)                                                                        | 4135.2(5)                                                                                       | 8042.4(8)                                                                                       | 8042.4(8)                                                                                       |
| Z                                  | 4                                                                                | 4                                                                                | 4                                                                                | 2                                                                                               | 4                                                                                               | 4                                                                                               |
| ρ <sub>calc</sub> /cm <sup>3</sup> | 1.683                                                                            | 1.699                                                                            | 1.696                                                                            | 1.598                                                                                           | 1.638                                                                                           | 1.635                                                                                           |
| μ/mm <sup>-1</sup>                 | 2.823                                                                            | 2.767                                                                            | 2.666                                                                            | 2.441                                                                                           | 2.411                                                                                           | 2.302                                                                                           |
| F(000)                             | 2236.0                                                                           | 2232.0                                                                           | 2228.0                                                                           | 1980.0                                                                                          | 3952.0                                                                                          | 3944.0                                                                                          |
| Crystal size/mm <sup>3</sup>       | 0.042 × 0.038 × 0.026                                                            | 0.045 × 0.036 × 0.028                                                            | 0.044 × 0.036 × 0.026                                                            | 0.056 × 0.033 × 0.021                                                                           | 0.264 × 0.223 × 0.181                                                                           | 0.245 × 0.213 × 0.164                                                                           |
| Radiation                          | MoKα (λ = 0.71073)                                                                              | MoKα (λ = 0.71073)                                                                              | MoKα (λ = 0.71073)                                                                              |
| 2θ range for data collection/°     | 4.12 to 50.998                                                                   | 4.55 to 50.998                                                                   | 4.548 to 56.608                                                                  | 4.056 to 50.992                                                                                 | 4.674 to 50.696                                                                                 | 4.674 to 50                                                                                     |
| Index ranges                       | -14 ≤ h ≤ 14, -23 ≤ k ≤ 25, -22 ≤ l ≤ 22                                         | -14 ≤ h ≤ 14, -25 ≤ k ≤ 25, -22 ≤ l ≤ 22                                         | -15 ≤ h ≤ 15, -27 ≤ k ≤ 27, -24 ≤ l ≤ 24                                         | -14 ≤ h ≤ 14, -19 ≤ k ≤ 19, -27 ≤ l ≤ 27                                                        | -43 ≤ h ≤ 43, -15 ≤ k ≤ 15, -23 ≤ l ≤ 23                                                        | -43 ≤ h ≤ 43, -15 ≤ k ≤ 15, -23 ≤ l ≤ 23                                                        |

|                                             |                                                               |                                                               |                                                                |                                                                |                                                               |                                                               |
|---------------------------------------------|---------------------------------------------------------------|---------------------------------------------------------------|----------------------------------------------------------------|----------------------------------------------------------------|---------------------------------------------------------------|---------------------------------------------------------------|
| Reflections collected                       | 33793                                                         | 52826                                                         | 69951                                                          | 110123                                                         | 50491                                                         | 48852                                                         |
| Independent reflections                     | 8209 [R <sub>int</sub> = 0.0476, R <sub>sigma</sub> = 0.0387] | 8098 [R <sub>int</sub> = 0.0628, R <sub>sigma</sub> = 0.0392] | 10811 [R <sub>int</sub> = 0.0766, R <sub>sigma</sub> = 0.0490] | 15403 [R <sub>int</sub> = 0.0760, R <sub>sigma</sub> = 0.0491] | 7361 [R <sub>int</sub> = 0.0525, R <sub>sigma</sub> = 0.0323] | 7065 [R <sub>int</sub> = 0.0513, R <sub>sigma</sub> = 0.0313] |
| Data/restraints / parameters                | 8209/5/574                                                    | 8098/8/568                                                    | 10811/6/568                                                    | 15403/12/1002                                                  | 7361/0/538                                                    | 7065/0/527                                                    |
| Goodness-of-fit on F <sup>2</sup>           | 1.037                                                         | 1.093                                                         | 1.066                                                          | 1.082                                                          | 1.048                                                         | 1.037                                                         |
| Final R indexes [I ≥ 2σ]                    | R <sub>1</sub> = 0.0373, wR <sub>2</sub> = 0.0924             | R <sub>1</sub> = 0.0471, wR <sub>2</sub> = 0.1260             | R <sub>1</sub> = 0.0458, wR <sub>2</sub> = 0.1227              | R <sub>1</sub> = 0.0553, wR <sub>2</sub> = 0.1369              | R <sub>1</sub> = 0.0406, wR <sub>2</sub> = 0.1089             | R <sub>1</sub> = 0.0415, wR <sub>2</sub> = 0.1108             |
| Final R indexes [all data]                  | R <sub>1</sub> = 0.0429, wR <sub>2</sub> = 0.0963             | R <sub>1</sub> = 0.0580, wR <sub>2</sub> = 0.1381             | R <sub>1</sub> = 0.0677, wR <sub>2</sub> = 0.1457              | R <sub>1</sub> = 0.0889, wR <sub>2</sub> = 0.1707              | R <sub>1</sub> = 0.0550, wR <sub>2</sub> = 0.1199             | R <sub>1</sub> = 0.0548, wR <sub>2</sub> = 0.1232             |
| Largest diff. peak/hole / e Å <sup>-3</sup> | 3.05/-1.93                                                    | 2.49/-2.2                                                     | 2.71/-2.14                                                     | 2.30/-1.30                                                     | 1.64/-0.90                                                    | 2.29/-0.59                                                    |

## Magnetic Measurement

The magnetization of powdered sample was measured over the 1.8–300 K temperature range using a Quantum Design SQUID-based MPMSXL-5-type magnetometer. Direct current (dc) measurements were recorded under 1000 Oe magnetic field in the range 300 to 2 K. Field dependent magnetization was recorded in the range of 0 to 7 T at 2 K.

## Computational Details

All the calculations have been done on the hydrogens optimized geometry using ORCA/5.0.3.<sup>[20]</sup> Initially, hydrogen positions were optimized using the BP86 functional and SV basis sets.<sup>[21]</sup>

Subsequently, these optimized hydrogen coordinates were used for the computation of spin Hamiltonian (SH) parameters.

All Ab initio calculations were carried out using the OpenMOLCAS code.<sup>[22]</sup> The spin-Hamiltonian parameters for the **1**, **2**, **4**, and **5**, complexes were derived using the complete active space self-consistent field (CASSCF) technique. An active space of CAS (9,7) i.e nine active electrons in the seven active *f*-orbitals of the Dy<sup>III</sup> ion, was taken into consideration for the complex **1** in order to estimate the spin-Hamiltonian parameters in the Complete Active Space Self-Consistent Field (CASSCF) framework.<sup>[23]</sup> Similarly, for complex **2**, an active space of CAS (8,7) was used for Tb<sup>III</sup> ion. Here, we have employed basis set ANO-RCC-VDZP for Ln (III), ANO-RCC-VDZ for C, O, N, and ANO-RCC-MB for H.<sup>[24,25]</sup> To speed up the calculations, the two-electron integrals were computed using the Resolution of Identity Cholesky decomposition (RICD) approximation.<sup>[26]</sup> For the single-ion properties of the Ln<sup>III</sup> ion in complex **4**, and **5**, the other paramagnetic ion in the respective complexes was replaced with the diamagnetic La<sup>III</sup> analogue. The Dy<sup>III</sup> ion has a 4*f*<sup>9</sup> configuration and possesses a <sup>6</sup>H<sub>15/2</sub> ground state, while Tb<sup>III</sup> ion has 4*f*<sup>8</sup> configuration with <sup>7</sup>F<sub>6</sub> ground state. We have computed 21 spin-free sextet states for complexes **1**, and **4** using an active space of CAS (9,7). In the next step we have mixed these CASSCF computed spin-free states via the SO-RASSI module to obtain the spin-orbit states.<sup>[27]</sup> Similar to this for complex **2**, and **5** we have computed 7 spin free septets, 140 spin free quintets, and 195 spin free triplets for Tb<sup>III</sup> ions. But, here we have mixed only 7 septets, 78 quartets, 27 triplets states in RASSI module to obtain the spin-orbit states. In the last step, the SINGLE ANISO module was used to extract the g-values, crystal field parameters, transition magnetic moments, magnetic susceptibility, and magnetization of individual Ln<sup>III</sup> ions in both complexes from these calculated spin orbit states.<sup>[28]</sup> Finally, the magnetic exchange

interaction (dipolar + exchange contribution) between the Ln<sup>III</sup> centers in complexes **4**, and **5** was calculated using the POLY ANISO module.<sup>[29]</sup> Additionally, the good match between our calculated molar magnetic susceptibility and molar magnetization and experimental findings gives the computed values more assurance. The more details of calculated relative energies of spin-free states, spin-orbit states, and g-values are provided in the Supporting Information section.

The magnetic exchange interaction in complex **6** was computed using SR-DFT (scalar relativistic density functional theory) computational technique at the B3LYP<sup>[30]</sup> level of theory on ORCA/5.0.3 The Douglas-Kroll-Hess (DKH) approximation was used to address scalar relativistic effects.<sup>[31]</sup> In this case, we used an all-electron scalar relativistic (SARC) basis set for Gd<sup>III</sup> together with DKH reconstructed versions of def2-type basis sets, and DKH-def2-SVP for the rest of the atoms as implemented in ORCA code. Dispersion corrections were incorporated by Grimme's dispersion and Becke-Johnson damping (D3BJ).<sup>[32]</sup> To speed up the calculations, resolution-of-identity-chain-of-sphere (RIJCOSX) formalism was employed.<sup>[33]</sup> The broken-symmetry DFT calculations were performed by flipping the spin on one Gd<sup>III</sup> center using the spin-flip approach as implemented in ORCA. The broken-symmetry calculations were verified by analyzing the spin-density on individual Gd<sup>III</sup> atoms. The exchange coupling was computed with the formula –  $J = - \frac{E_{HS} - E_{BS}}{2S_1 S_2 + S_2}$

**Table S11.** BS-DFT computed energies of high-spin and broken-symmetry solution, spin densities, and  $J$  values complex **6**.

| Solutions | Energy (Hartree)    | $\rho^{Gd}$ | $\rho^{Gd}$ | $\langle S^2 \rangle$ | $J$ (cm <sup>-1</sup> ) | $J$ for Dy <sup>III</sup><br>(= $J*25/49$ ) | $J$ for Tb <sup>III</sup> (= $J*36/49$ ) |
|-----------|---------------------|-------------|-------------|-----------------------|-------------------------|---------------------------------------------|------------------------------------------|
| HS        | -31296.557390685437 | 7.025       | 7.024       | 56.0120               | -0.019                  | -0.009                                      | -0.014                                   |
| BS        | -31296.55739160294  | -7.017      | 7.016       | 7.0120                |                         |                                             |                                          |

$J$  values are estimated using the following equation,

$$J = -\frac{E_{HS} - E_{BS}}{2S_1S_2 + S_2}$$

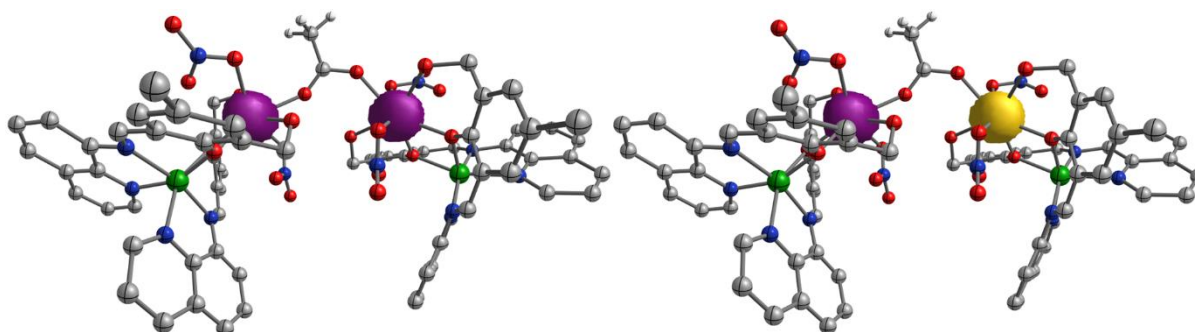

**Figure S30:** DFT computed spin-density plot of; (a) High Spin ( $S = 7$ ); (b) Broken Symmetry ( $S = 0$ ) of complex **6**. The purple and yellow Color represent the positive and negative spin density respectively, with an isosurface value of 0.01 e<sup>-</sup>/bohr<sup>3</sup>. (Color code: Gd -olive; Zn -Green; O - red; N-blue; C-grey; H-white).

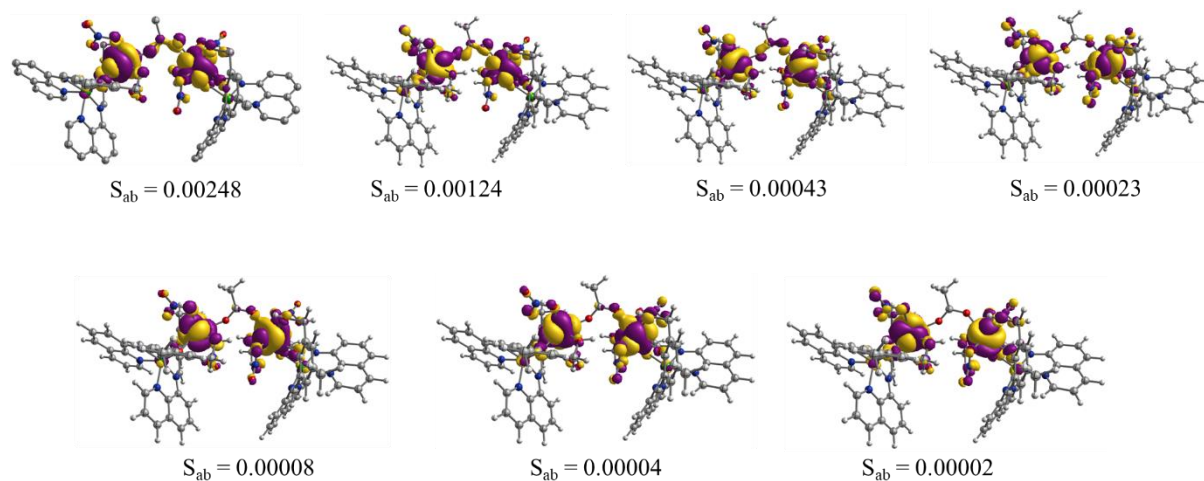

**Figure S31.** DFT computed corresponding orbitals for which the overlap integral values were calculated complex **6** at contour value = 0.01 e-/bohr<sup>3</sup>. (Color code: Gd -olive; Zn -Green; O - red; N-blue; C-grey; H-white).

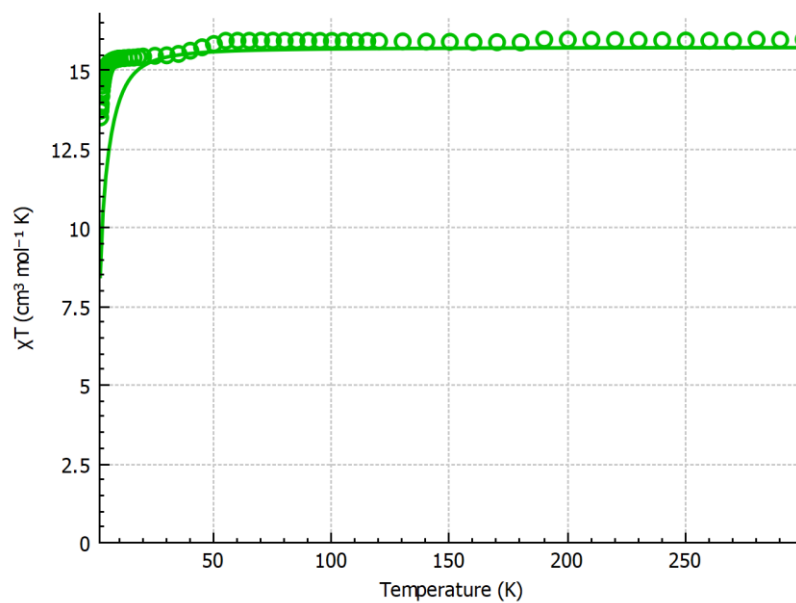

**Figure S32.** Temperature dependence of  $\chi T$  products for complex **6** under a dc field of 1000 Oe. The green solid lines are simulated simultaneously by using PHI software.

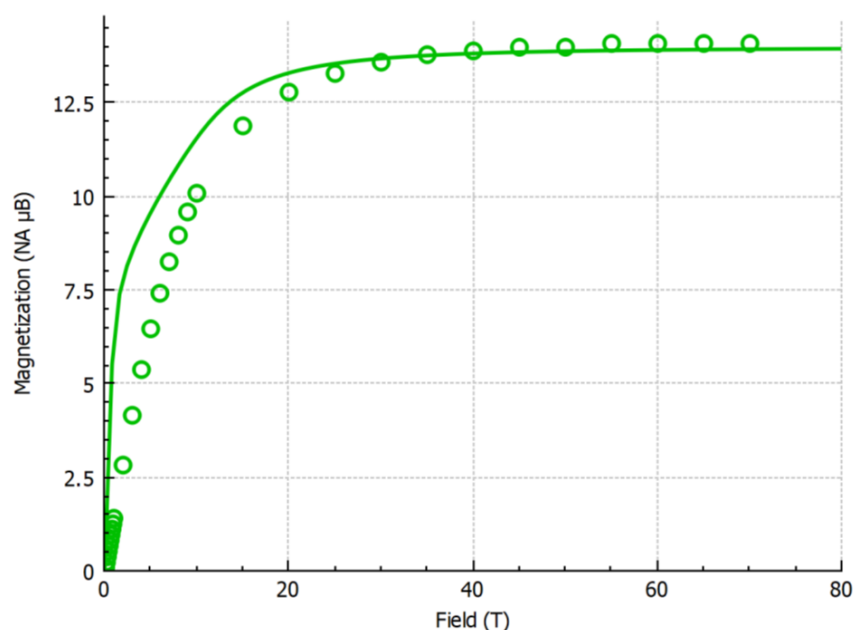

**Figure S33.** Field dependence of the magnetization data at 2K for complex **6**. The green solid lines are simulated simultaneously by using PHI software.

**Table S12.** SINGLE\_ANISO computed  $g$ -tensors, the angle of deviation from ground state  $g_{zz}$  orientation, and relative energies of eight low lying Kramers' doublets for Dy center in trimer complex **1**.

| KDs      | Energy<br>( $\text{cm}^{-1}$ ) | $g_{xx}$ | $g_{yy}$ | $g_{zz}$ | $\theta$ |
|----------|--------------------------------|----------|----------|----------|----------|
| <b>1</b> | 0.0                            | 0.0020   | 0.0030   | 19.9322  |          |
| <b>2</b> | 127.1                          | 0.0188   | 0.0231   | 17.1657  | 5.4      |
| <b>3</b> | 236.9                          | 0.2907   | 0.4016   | 14.0287  | 8.2      |
| <b>4</b> | 286.0                          | 0.1009   | 0.5559   | 17.8642  | 72.5     |
| <b>5</b> | 309.9                          | 4.6691   | 5.8436   | 8.9062   | 33.0     |
| <b>6</b> | 356.4                          | 2.8158   | 3.9664   | 13.8858  | 86.7     |
| <b>7</b> | 404.5                          | 0.4929   | 0.8254   | 18.9721  | 89.9     |
| <b>8</b> | 620.4                          | 0.0067   | 0.0121   | 19.7944  | 63.2     |

**Table S13.** SINGLE\_ANISO computed g-tensors, the angle of deviation from ground state  $g_{zz}$  orientation, and relative energies of low lying SOC states for Tb center in trimer complex **2**.

| KDs      | Energy (cm <sup>-1</sup> ) | $g_{xx}$ | $g_{yy}$ | $g_{zz}$ | $\theta$ |
|----------|----------------------------|----------|----------|----------|----------|
| <b>1</b> | 0.0                        | 0.0000   | 0.0000   | 17.7162  |          |
|          | 0.5                        |          |          |          |          |
| <b>2</b> | 156.1                      | 0.0000   | 0.0000   | 14.0441  | 5.4      |
|          | 163.6                      |          |          |          |          |
| <b>3</b> | 272.6                      | 0.0000   | 0.0000   | 10.2207  | 7.8      |
|          | 307.3                      |          |          |          |          |
| <b>4</b> | 353.7                      | 0.0000   | 0.0000   | 6.6713   | 30.3     |
|          | 397.2                      |          |          |          |          |
| <b>5</b> | 405.3                      |          |          |          |          |
| <b>6</b> | 463.7                      | 0.0000   | 0.0000   | 14.1891  | 97.6     |
|          | 468.0                      |          |          |          |          |
| <b>7</b> | 568.6                      | 0.0000   | 0.0000   | 16.3429  | 103.5    |
|          | 569.1                      |          |          |          |          |

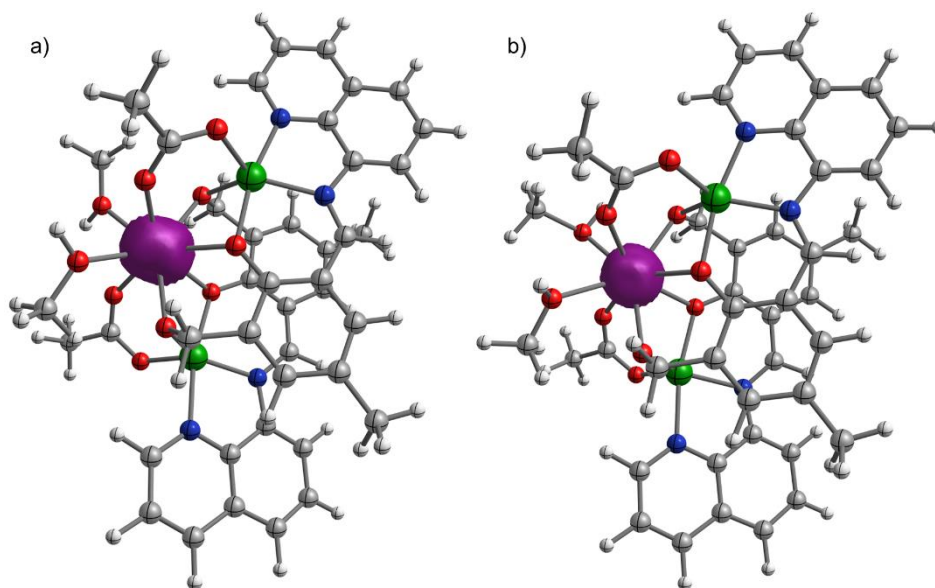

**Figure S34.** SINGLE\_ANISO computed  $\beta$  - spin density for trimer a) complex **1** and b) complex **2** at contour value = 0.003 e-/bohr<sup>3</sup>. (Color code: Dy -Magenta; Tb -Teal; Zn -Green; O -red; N-blue; C-grey; H-white)



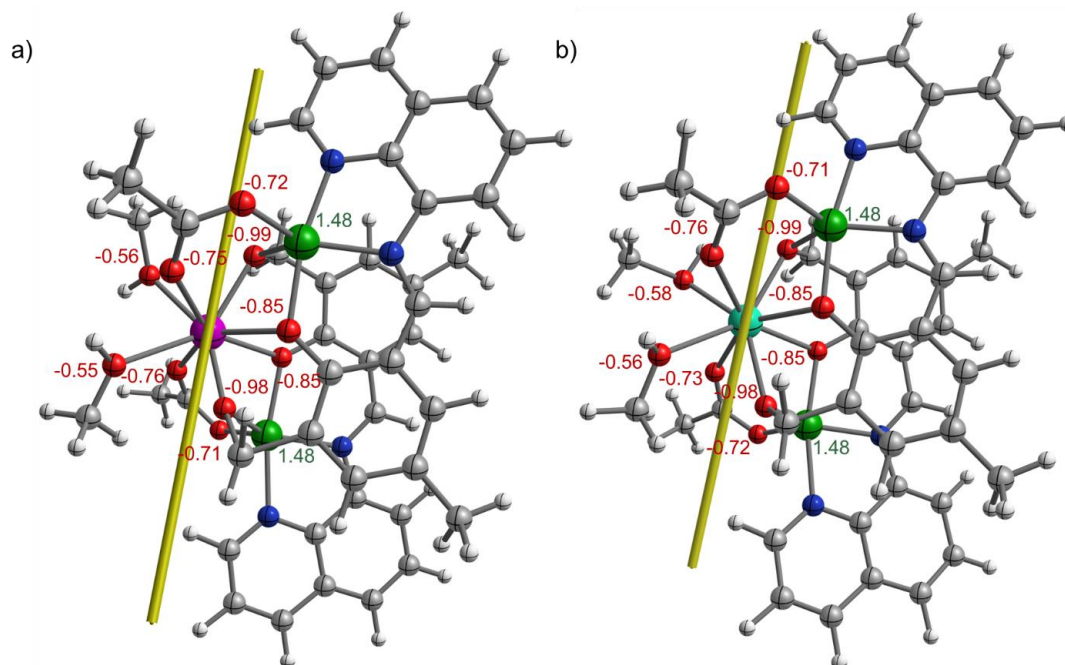

**Figure S35.** CASSCF computed LoProp charges on the first coordinating atoms of Dy center in trimeric (a) complex **1**; Tb center in (b) complex **2** respectively. (Color code: Dy -Magenta; Tb -Teal; Zn -Green; O -red; N-blue; C-grey; H-white).

**Table S14.** SINGLE\_ANISO computed  $g$ -tensors, the angle of deviation from ground state  $g_{zz}$  orientation, and relative energies of eight low lying Kramers' doublets for Dy@1 and Dy@2 centers in tetramer complex **4**.

| Dy@1                          |          |          |          |          | Dy@2                          |          |          |          |          |
|-------------------------------|----------|----------|----------|----------|-------------------------------|----------|----------|----------|----------|
| Energy<br>(cm <sup>-1</sup> ) | $g_{xx}$ | $g_{yy}$ | $g_{zz}$ | $\theta$ | Energy<br>(cm <sup>-1</sup> ) | $g_{xx}$ | $g_{yy}$ | $g_{zz}$ | $\theta$ |
| 0.0                           | 0.0485   | 0.0855   | 19.7674  |          | 0.0                           | 0.0489   | 0.0916   | 19.7362  |          |
| 106.6                         | 0.7007   | 1.3639   | 16.1131  | 6.4      | 116.6                         | 0.6683   | 1.1128   | 16.2383  | 6.3      |
| 169.1                         | 2.3399   | 3.4843   | 11.3745  | 11.0     | 203.4                         | 2.2186   | 3.3760   | 11.7014  | 17.9     |
| 229.8                         | 3.2380   | 5.7900   | 9.2231   | 91.7     | 257.4                         | 2.9692   | 5.0811   | 12.8213  | 93.8     |
| 305.4                         | 1.5628   | 2.1953   | 11.4225  | 84.8     | 325.5                         | 1.3390   | 2.0744   | 11.8399  | 89.0     |
| 444.9                         | 0.0820   | 0.1201   | 14.9364  | 80.0     | 487.3                         | 0.0155   | 0.0337   | 14.7801  | 92.3     |
| 513.5                         | 0.0241   | 0.0330   | 19.2017  | 88.1     | 578.4                         | 0.0051   | 0.0089   | 19.6589  | 92.1     |
| 681.2                         | 0.0035   | 0.0060   | 19.6386  | 90.6     | 637.1                         | 0.0020   | 0.0182   | 18.0748  | 93.6     |

**Table S15.** SINGLE\_ANISO computed g-tensors, the angle of deviation from ground state  $g_{zz}$  orientation, and relative energies of eight low lying Kramers' doublets for Tb@1 and Tb@2 centers in tetramer complex **5**.

|                      | <b>Tb@1</b> |          |          |          |                      | <b>Tb@2</b> |          |          |          |
|----------------------|-------------|----------|----------|----------|----------------------|-------------|----------|----------|----------|
| <b>Energy (cm-1)</b> | $g_{xx}$    | $g_{yy}$ | $g_{zz}$ | $\theta$ | <b>Energy (cm-1)</b> | $g_{xx}$    | $g_{yy}$ | $g_{zz}$ | $\theta$ |
| <b>0.0</b>           | 0.0000      | 0.0000   | 17.7608  |          | 0.0                  | 0.0000      | 0.0000   | 17.8081  |          |
| <b>0.4</b>           |             |          |          |          | 0.3                  |             |          |          |          |
| <b>127.5</b>         | 0.0000      | 0.0000   | 14.3093  | 2.1      | 160.7                | 0.0000      | 0.0000   | 14.3628  | 0.9      |
| 131.2                |             |          |          |          | 164.4                |             |          |          |          |
| <b>225.6</b>         | 0.0000      | 0.0000   | 10.6293  | 7.6      | 282.9                | 0.0000      | 0.0000   | 10.4699  | 6.0      |
| 229.9                |             |          |          |          | 292.8                |             |          |          |          |
| <b>287.8</b>         |             |          |          |          | 352.4                |             |          |          |          |
| <b>327.0</b>         | 0.0000      | 0.0000   | 10.3038  | 91.5     | 411.3                | 0.0000      | 0.0000   | 10.5496  | 88.0     |
| 346.5                |             |          |          |          | 424.6                |             |          |          |          |
| <b>428.8</b>         | 0.0000      | 0.0000   | 14.4320  | 90.2     | 529.6                | 0.0000      | 0.0000   | 14.5994  | 89.8     |
| 431.8                |             |          |          |          | 531.5                |             |          |          |          |
| <b>719.1</b>         | 0.0000      | 0.0000   | 17.8238  | 89.0     | 850.2                | 0.0000      | 0.0000   | 17.8291  | 94.5     |
| 719.2                |             |          |          |          | 850.3                |             |          |          |          |

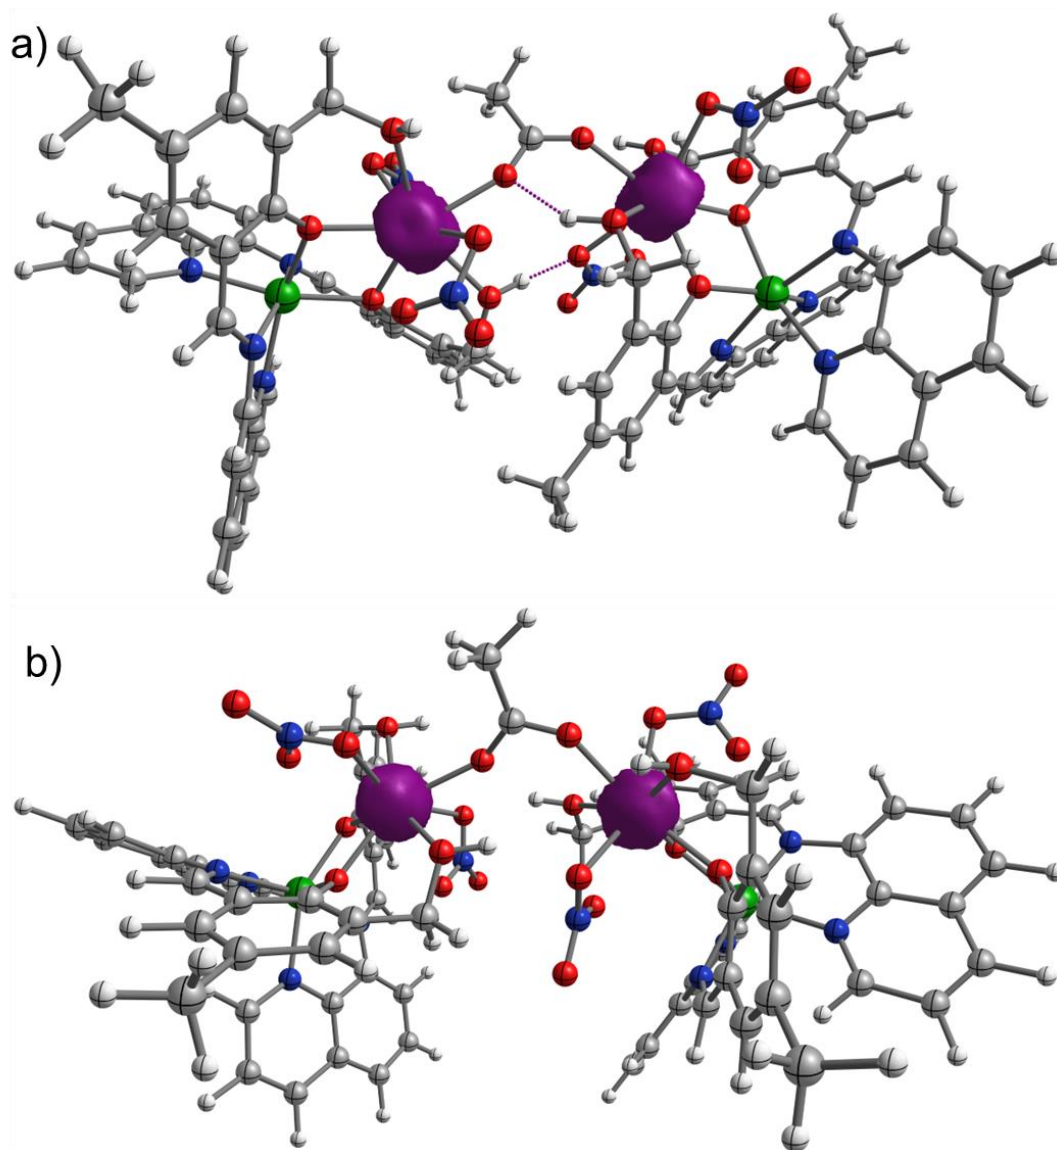

**Figure S36.** SINGLE\_ANISO computed  $\beta$  - spin density a) complex **4** and b) complex **5** at contour value =  $0.01 \text{ e}^-/\text{bohr}^3$  (Color code: Dy -Magenta; Tb -Teal; Zn -Green; O -red; N-blue; C-grey; H-white).

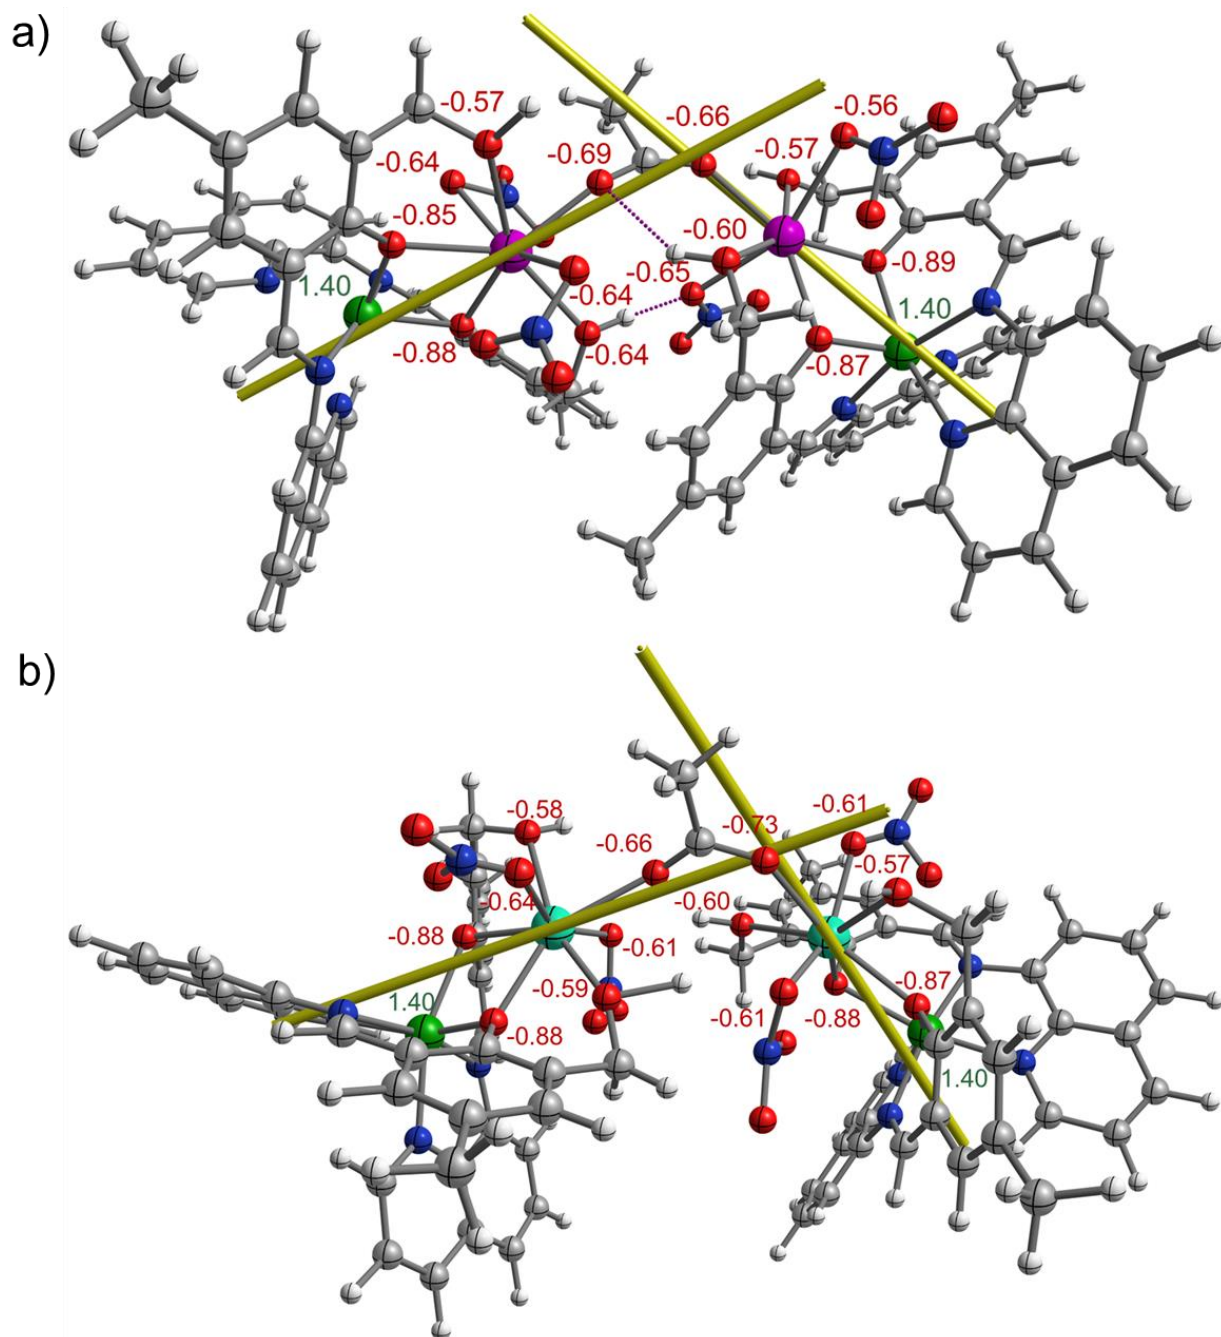

**Figure S37.** CASSCF computed LoProp charges on the first coordinating atoms of Dy centers in complex **4** b) Tb centers in complex **5** (Color code: Dy -Magenta; Tb -Teal; Zn -Green; O -red; N-blue; C-grey; H-white).

**Table S16.** Exchange and dipolar interaction were obtained from the POLY\_ANISO simulation from the best fit using the Lines model for **4**.

| $J_{tot}$ | $J_{ex}$ | $J_{dipo}$ | $z_J$  |
|-----------|----------|------------|--------|
| -0.80     | -0.801   | 0.001      | -0.002 |

**Table S17.** Energies of the low-lying non-Kramers' exchange doublets along with  $g_{zz}$  and tunneling gap obtained from POLY\_ANISO simulation for **4**.

| Exchange doublet | E (cm <sup>-1</sup> ) | $g_{zz}$ | $\Delta_{tunnel}$ |
|------------------|-----------------------|----------|-------------------|
| <b>1</b>         | 0.0                   | 21.8677  | 5.1E-04           |
| <b>2</b>         | 3.0                   | 32.6200  | 2.9E-04           |
| <b>3</b>         | 106.8                 | 19.4383  | 7.8E-03           |
| <b>4</b>         | 109.5                 | 30.0406  | 4.8E-03           |
| <b>5</b>         | 116.5                 | 18.5788  | 5.2E-03           |
| <b>6</b>         | 119.7                 | 30.9126  | 3.1E-03           |
| <b>7</b>         | 223.3                 | 15.8667  | 8.3E-02           |
| <b>8</b>         | 226.1                 | 28.0433  | 4.6E-02           |

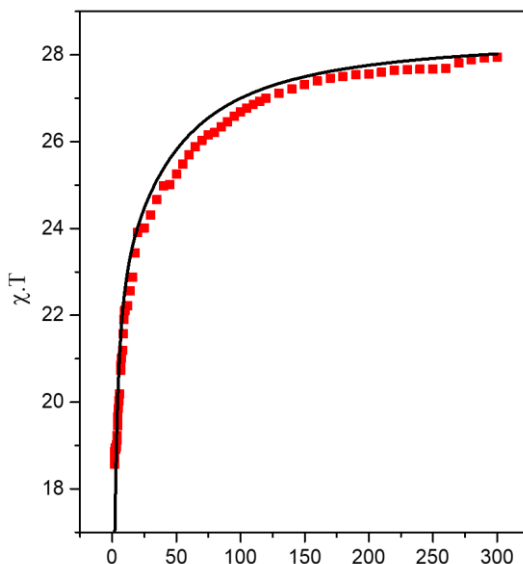

**Figure S38.** Thermal dependence of the molecular magnetic susceptibility for **1**. The red boxes are the experimental values, while the black line represents the POLY\_ANISO simulated data.

**Table S18.** Exchange and dipolar interaction were obtained from the POLY\_ANISO simulation from the best fit using the Lines model for **5**.

| $J_{tot}$ | $J_{ex}$ | $J_{dipo}$ | $z_J$  |
|-----------|----------|------------|--------|
| -0.001    | -0.0011  | 0.0001     | -0.002 |

**Table S19.** Energies of the low-lying non-Kramers' exchange doublets along with  $g_{zz}$  and tunneling gap obtained from POLY\_ANISO simulation for **5**.

| Exchange doublet | E (cm <sup>-1</sup> ) | $g_{zz}$ | $\Delta_{tunnel}$ |
|------------------|-----------------------|----------|-------------------|
| <b>1</b>         | 0.1                   | 24.5577  | 1.5E-01           |
| <b>2</b>         | 0.7                   | 20.5904  | 1.5E-01           |
| <b>3</b>         | 127.8                 | 18.1848  | 2.9E-01           |
| <b>4</b>         | 131.5                 | 17.5691  | 2.9E-01           |
| <b>5</b>         | 160.9                 | 18.1000  | 3.5E-01           |
| <b>6</b>         | 164.7                 | 17.5538  | 3.5E-01           |
| <b>7</b>         | 290.1                 | 15.9763  | 3.5               |
| <b>8</b>         | 294.0                 | 13.1921  | 3.5               |

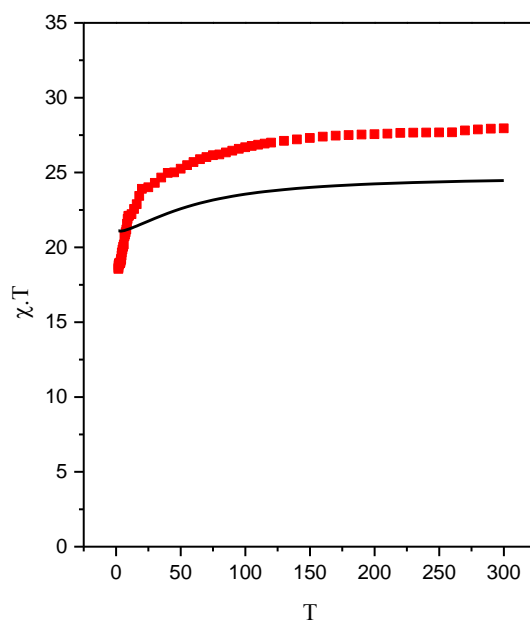

**Figure S39.** Thermal dependence of the molecular magnetic susceptibility for **1**. The red boxes are the experimental values, while the black line represents the POLY\_ANISO simulated data.

## Reference

- [1] Y. Cui, F. Zheng, Y. Qian, J. Huang, *Inorg. Chim. Acta.* **2001**, *315*, 220-228.
- [2] S. Das, K. S. Bejoymohandas, A. Dey, S. Biswas, M. L. P. Reddy, R. Morales, E. Ruiz, S. T.-Padilla, E. Colacio, V. Chandrasekhar, *Chem. Eur. J.*, **2015**, *21*, 6449-6464.
- [3] P. Shukla, K. U. Ansari, C. Gao, S. Vaidya, S. Tripathi, P. Kumar, R. J. Butcher, J. Overgaard, M. Shanmugam, *Dalton Trans.*, **2020**, *49*, 10580-10593.
- [4] M. Fondo, J. Corredoira-Vázquez, A. M. García-Deibe, J. Sanmartín-Matalobos, J. M. Herrera, E. Colacio, *Inorg. Chem.* **2017**, *56*, 10, 5646–5656.
- [5] M. Fondo, J. Corredoira-Vázquez, A. Herrera-Lanzós, A. M. García-Deibe, J. Sanmartín-Matalobos, J. M. Herrera, E. Colacio, C. Nuñez, *Dalton Trans.* **2017**, *46*, 17000-17009.
- [6] J. P. Costes, S. Titos-Padilla, I. Oyarzabal, T. Gupta, C. Duhayon, G. Rajaraman, E. Colacio, *Chem. Eur. J.* **2015**, *21*, 15785-15796.
- [7] S. Das, K. S. Bejoymohandas, A. Dey, S. Biswas, M. L. P. Reddy, R. Morales, E. Ruiz, S. Titos-Padilla, E. Colacio, V. Chandrasekhar, *Chem. Eur. J.* **2015**, *21*, 6449-6464.
- [8] P. Shukla, K. U. Ansari, C. Gao, S. Vaidya, S. Tripathi, P. Kumar, R. J. Butcher, J. Overgaard, M. Shanmugam, *Dalton Trans.* **2020**, *49*, 10580-10593.
- [9] E. Echenique-Errandonea, A. Zabala-Lekuona, J. Cepeda, A. Rodríguez-Diéíguez, J. M. Seco, I. Oyarzabal, E. Colacio, *Dalton Trans.* **2019**, *48*, 190-201.
- [10] S. Titos-Padilla, J. Ruiz, J. M. Herrera, E. K. Brechin, W. Wersndorfer, F. Lloret, E. Colacio, *Inorg. Chem.* **2013**, *52*, 9620–9626.
- [11] S. Ghosh, N. Hari, D. Pinkowicz, M. Fitta, S. Mohanta, *New J. Chem.* **2018**, *42*, 15917-15929.
- [12] H. Yan, C.-M. Wang, P. Chen, Y.-Q. Zhang, W.-B. Sun, *Dalton Trans.* **2022**, *51*, 6918-6926.
- [13] *SMART & SAINT Software Reference manuals*, Bruker Analytical X-ray Systems, Inc., Madison, **2003**.
- [14] G. M. Sheldrick, *Bruker AXS Inc., Madison, WI SAINT (Version 6.02), SADABS (Version 2.03)*, **2002**.
- [15] *SHELXTL, Reference Manual, Ver. 6.1*, Bruker Analytical X-ray Systems, Inc., Madison, WI, **2000**.
- [16] K. Bradenburg, *Diamond, Ver. 3.1eM, Crystal Impact GbR, Bonn, Germany* **2005**.
- [17] O. V. Dolomanov, L. J. Bourhis, R. J. Gildea, J. A. K. Howard, H. Puschmann, *J. Appl. Crystallogr.* **2009**, *42*, 339-341.
- [18] P. van der Sluis, A. L. Spek, *Acta Crystallogr. Sect. A: Found. Crystallogr.* **1990**, *46*, 194201.
- [19] A. Spek, *Acta Crystallogr. Sect. A: Found. Crystallogr.* **1990**, *46*, c3.
- [20] F. Neese, *Wiley Interdiscip. Rev. Comput. Mol.*, **2022**, *12*, e1606.
- [21] a) J. P. Perdew *Phys. Rev. B: Condens. Matter Mater. Phys.*, **1986**, *33*, 8822-8824 b) A. D. Becke *Phys. Rev. A*, **1988**, *38*, 3098.
- [22] G. L. Manni, I. F. Galván, A. Alavi, F. Aleotti, F. Aquilante, J. Autschbach, D. Avagliano, A. Baiardi, J. J. Bao, S. Battaglia, L. Birnoschi, A. Blanco-González, S. I. Bokarev, R. Broer, R. Cacciari, P. B. Calio, R. K. Carlson, R. C. Couto, L. Cerdán, L. F. Chibotaru, N. F. Chilton, J. R. Church, I. Conti, S. Coriani, J. Cuéllar-Zuquin, R. E. Daoud, N. Dattani, P. Decleva, C. de Graaf, M. G. Delcey, L. De Vico, W. Dobrutz, S. J. S. Dong, R. L. Feng, N. Ferré, M. Filatov, L. Gagliardi, M. Garavelli, L. González, Y. F. Guan, M. Y.

- Guo, M. R. Hennefarth, M. R. Hermes, C. E. Hoyer, M. Huix-Rotllant, V. K. Jaiswal, A. Kaiser, D. S. Kaliakin, M. Khamesian, D. S. King, V. Kochetov, M. Krosnicki, A. A. Kumaar, E. D. Larsson, S. Lehtola, M. B. Lepetit, H. Lischka, P. L. Ríos, M. Lundberg, D. X. Ma, S. Mai, P. Marquetand, I. C. D. Merritt, F. Montorsi, M. Mörchen, A. Nenov, V. H. A. Nguyen, Y. Nishimoto, M. S. Oakley, M. Olivucci, M. Oppel, D. Padula, R. Pandharkar, Q. M. Phung, F. Plasser, G. Raggi, E. Rebolini, M. Reiher, I. Rivalta, D. Roca-Sanjuán, T. Romig, A. A. Safari, A. Sánchez-Mansilla, A. M. Sand, I. Schapiro, T. R. Scott, J. Segarra-Martí, F. Segatta, D. C. Sergentu, P. Sharma, R. Shepard, Y. N. Shu, J. K. Staab, T. P. Straatsma, L. K. Sorensen, B. N. C. Tenorio, D. G. Truhlar, L. Ungur, M. Vacher, V. Veryazov, T. A. Voss, O. Weser, D. H. Wu, X. C. Yang, D. Yarkony, C. Zhou, J. P. Zobel, R. Lindh, *J. Chem. Theory Comput.*, **2023**, *19*, 6933-6991.
- [23] B. O. Roos, P. R. Taylor, P. E. M. Sigbahn, *Chem. Phys.*, **1980**, *48*, 157-173.
- [24] B. O. Roos, V. Veryazov, P.-O. Widmark, *Theor. Chem. Acc.*, **2004**, *111*, 345-351.
- [25] B. O. Roos, R. Lindh, P.-Å. Malmqvist, V. Veryazov, P.-O. Widmark, A. C. Borin, *J. Phys. Chem. A*, **2008**, *112*, 11431-11435.
- [26] F. Aquilante, R. Lindh, T. Bondo Pedersen, *J. Chem. Phys.*, **2007**, *127*, 114107.
- [27] P. Å. Malmqvist, B. O. Roos, B. Schimmelpfennig, *Chem. Phys. Lett.*, **2002**, *357*, 230-240.
- [28] L. F. Chibotaru and L. Ungur, *J. Chem. Phys.*, **2012**, *137*, 064112.
- [29] a) L. F. Chibotaru, L. Ungur, C. Aronica, H. Elmoll, G. Pilet, D. Luneau, *J. Am. Chem. Soc.*, **2008**, *130*, 12445-12455. b) L. F. Chibotaru, L. Ungur, A. Soncini, *Angew. Chem., Int. Ed.*, **2008**, *47*, 4126-4129. c) L. Ungur, W. Van den Heuvel, L. F. Chibotaru, *New J. Chem.*, **2009**, *33*, 1224-1230.
- [30] A. D. Becke, *J. Chem. Phys.*, **1993**, *98*, 5648-5652.
- [31] B. A. Hess, *Phys. Rev. A*, **1986**, *33*, 3742-3748.
- [32] a) S. Grimme, J. Antony, S. Ehrlich, H. Krieg, *J. Chem. Phys.*, **2010**, *132*, 154104. b) S. Grimme, S. Ehrlich, L. Goerigk, *J. Comput. Chem.*, **2011**, *32*, 1456-1465.
- [33] J. M. Guevara-Vela, T. Rocha-Rinza, Á. M. Pendás, *Theor. Chem. Acc.*, **2017**, *136*, 57.
